1 ***In planta* chromatin immunoprecipitation in *Zymoseptoria tritici* reveals chromatin-**  
2 **based regulation of putative effector gene expression**

3 Jessica L. Soyer<sup>1,2\*</sup>, Jonathan Grandaubert<sup>2,3</sup>, Janine Haueisen<sup>2</sup>, Klaas Schotanus<sup>2,4</sup>, Eva H.  
4 Stukenbrock<sup>2</sup>

5 <sup>1</sup>UMR BIOGER, INRA, AgroParisTech, Paris-Saclay University, 78850 Thiverval-Grignon,  
6 France

7 <sup>2</sup>Max Planck Institute for Evolutionary Biology, August-Thienemann-Str. 2, 24306 Plön,  
8 and Christian-Albrechts University of Kiel, Am Botanischen Garten 1-9, 24118 Kiel,  
9 Germany

10 <sup>3</sup>Present address: Department of Mycology, Fungal Biology and Pathogenicity Unit,  
11 Institut Pasteur, INRA, 75015, Paris, France

12 <sup>4</sup>Departments of Molecular Genetics and Microbiology (MGM), Pharmacology and Cancer  
13 Biology, and Medicine, Duke University Medical Center, Durham, North Carolina, United  
14 States of America

15 **Short title: Histone dynamics in *Z. tritici* during infection**

16 **Keywords:** Heterochromatin; effectors; gene regulation; ChIP; *Zymoseptoria tritici*;  
17 *Triticum aestivum*

18 Corresponding author: Jessica L. Soyer, [jessica.soyer@inra.fr](mailto:jessica.soyer@inra.fr)

19 Summary: 229; Introduction: 645; Results: 3101; Discussion: 1300; Experimental  
20 Procedures: 1097; Acknowledgements: 41; Figure & Table legends: 923.

## 21 **Summary**

22 During infection, pathogens secrete effectors, key elements of pathogenesis. In several  
23 phytopathogenic fungi, synchronous waves of effector genes are expressed during plant  
24 infection to manipulate and silence plant defenses. In *Zymoseptoria tritici*, causing  
25 septoria leaf blotch of wheat, at least two waves of effector genes are expressed, during  
26 the asymptomatic phase and at the switch to necrotrophy. The underlying factors  
27 responsible for the fine-tuned regulation of effector gene expression in this pathogen are  
28 unknown. Previously, a detailed map of the chromatin structure *in vitro* of *Z. tritici* was  
29 generated by chromatin immunoprecipitation followed by high-throughput sequencing  
30 (ChIP-seq) targeting histone modifications typical for euchromatin (di-methylation of the  
31 lysine 4 of the histone H3, H3K4me2) or heterochromatin (tri-methylation of the lysine 9  
32 and 27 of the histone H3, H3K9me3 and H3K27me3). Based on the hypothesis that  
33 changes in the histone modifications contribute to the transcriptional control of  
34 pathogenicity-related genes, we tested whether different sets of genes are associated  
35 with different histone modifications *in vitro*. We correlated the *in vitro* histone maps with  
36 *in planta* transcriptome data and show that genes located in heterochromatic domains *in*  
37 *vitro* are highly up-regulated at the switch toward necrotrophy. We combined our  
38 integrated analyses of genomic, transcriptomic and epigenomic data with ChIP-qPCR *in*  
39 *planta* and thereby provide further evidence for the involvement of histone modifications  
40 in the transcriptional dynamic of putative pathogenicity-related genes of *Z. tritici*.

41

## 42 Introduction

43 Fungi that colonize plant tissues, pathogens as well as mutualists, express effector genes  
44 required for their establishment within the plant tissue (Lo Presti *et al.*, 2015; Tyler and  
45 Rouxel, 2013). Transcriptomic analyzes have shown that effector genes are poorly  
46 expressed during axenic growth and strongly induced during host infection with several  
47 waves of concerted expression associated to infection stages (e.g. in *Melampsora larici-*  
48 *populina*, *Colletotrichum* species, *Leptosphaeria maculans*; Gervais *et al.*, 2017; Hacquard  
49 *et al.*, 2012; Lorrain *et al.*, 2018; O'Connell *et al.*, 2012). The fine-tuned regulation of  
50 effector genes is important for successful plant infection by fungi. However, very little is  
51 known about the underlying mechanisms that regulate expression of effector genes  
52 during different stages of host infection.

53 Transposable element (TE) rich regions of the genome are often enriched in genes  
54 encoding proteinaceous effectors or secondary metabolites (Soyer *et al.*, 2015a). In the  
55 oilseed rape pathogen *L. maculans*, effector genes expressed during infection of young  
56 leaves are enriched in TE-rich regions while effector genes expressed during stem  
57 infection are enriched in gene-rich regions of the genome (Gervais *et al.*, 2017).

58 In *L. maculans* and in the distantly related fungi *Epichloe festucae*, a symbiont of the grass  
59 *Lolium perenne*, it has been shown that histone modifications play a crucial role in the  
60 regulation of genes located in TE-rich regions involved in the establishment of fungus-  
61 plant interactions (Chujo and Scott 2014; Soyer *et al.*, 2014). These studies support the  
62 hypothesis that chromatin-mediated gene regulation represents an efficient strategy to

63 control genes located in the vicinity of TEs.

64 *Zymoseptoria tritici* causes the septoria tritici blotch disease on wheat (*Triticum aestivum*)  
65 (O'Driscoll *et al.*, 2014). Infection conferred by *Z. tritici* is initiated by a asymptomatic  
66 phase during which the pathogen grows intercellularly. Ten to 12 days post infection, the  
67 fungus switches to a necrotrophic stage inducing host cell death. The release of nutrients  
68 from dead plant cells allows the formation of pycnidia and the production of asexual  
69 spores responsible for new infections. Thus, successful infection of *Z. tritici* involves a  
70 lifestyle transition conferred by distinct transcriptional programs (Hauelsen *et al.*, 2018;  
71 Rudd *et al.*, 2015; Palma-Guerrero *et al.*, 2016). So far, little is known about the regulation  
72 of the different infection programs set up by this fungus.

73

74 The genome of *Z. tritici* comprises 13 core chromosomes and a variable number of  
75 accessory chromosomes showing presence-absence polymorphisms in different isolates  
76 (Wittenberg *et al.*, 2009; Goodwin *et al.*, 2011; Möller *et al.*, 2018). TEs represent 18% of  
77 the genome with a considerably higher abundance on the accessory chromosomes than  
78 on core chromosomes (Dhillon *et al.*, 2014; Grandaubert *et al.*, 2015). Transcriptomic  
79 analyses revealed a dramatic difference in the expression of genes located on core and  
80 accessory chromosomes, with the latter showing no or very low expression of most genes  
81 *in vitro* as well as *in planta* (Kellner *et al.*, 2014; Hauelsen *et al.*, 2018).

82 In a previous study, we performed chromatin immunoprecipitation followed by high-  
83 throughput sequencing (ChIP-seq) *in vitro* to determine the genome-wide location of  
84 histone modifications typical for euchromatin (di-methylation of the lysine 4 of the

85 histone H3, H3K4me2) or with heterochromatin (tri-methylation of the lysines 9 and 27  
86 of H3, H3K9me3 and H3K27me3) (Schotanus *et al.*, 2015). In *Z. tritici*, TE-rich regions are  
87 enriched with both heterochromatic marks, H3K9me3 and H3K27me3. Furthermore, we  
88 confirmed that transcriptional silencing of genes on the accessory chromosomes is due to  
89 the strong enrichment with heterochromatic DNA as these chromosomes are almost  
90 entirely associated with H3K27me3 (Schotanus *et al.*, 2015).

91 Here, we investigated whether a chromatin-based control plays a role in the  
92 transcriptional regulation of pathogenicity-related genes in *Z. tritici*. We combined and  
93 integrated genomic, transcriptomic and epigenomic data and performed ChIP followed  
94 by quantitative PCR (ChIP-qPCR) analysis of targeted genes during plant infection. We  
95 provide evidence for an involvement of H3K9/K27me3 dynamics in the transcriptional  
96 regulation of putative pathogenicity genes of *Z. tritici*.

97

## 98 **Results**

### 99 Distribution of histone modifications in the coding fraction of the *Zymoseptoria tritici* 100 genome

101 The ChIP-seq datasets generated from axenic cultures of the isolate Zt09 were analyzed  
102 to identify the genes associated with H3K4me2, H3K9me3 or H3K27me3. As previously  
103 described, H3K4me2 is mainly associated with gene-rich regions while the  
104 heterochromatin mark H3K9me3 is associated with the repetitive regions of the *Z. tritici*  
105 genome; H3K27me3 is likewise associated with repetitive sequences, telomeric regions,

106 accessory chromosomes, and with some gene coding sequences on core chromosomes.

107 We used the genome wide maps of H3K4me2, H3K9me3 and H3K27me3 from *in vitro*  
108 growth to distinguish genes either entirely or partially (> 1 bp) associated with each of the  
109 three histone modifications. Forty-two percent of the predicted genes in the genome are  
110 either associated with H3K4me2 (4,992 out of the 11,754 genes predicted in the genome),  
111 0.75% (89 genes) with H3K9me3, 18.5% (2,179 genes) with H3K27me3 and 1.95% (230  
112 genes) with both H3K9me3 and H3K27me3 (Figure 1A and 1B).

113

114 Genes located in H3K9me3 and H3K27me3 domains are less conserved and encode  
115 proteins putatively involved in virulence

116 We assessed the correlation of chromatin marks with the distribution of specific-specific  
117 genes previously identified in *Z. tritici* (Grandaubert *et al.*, 2015). Using comparative  
118 genomics of four *Zymoseptoria* species, i.e., *Z. tritici*, *Zymoseptoria pseudotritici*,  
119 *Zymoseptoria ardabiliae* and *Zymoseptoria brevis*, we previously identified 1,717 genes  
120 unique to *Z. tritici*. We found that these genes are significantly enriched in regions of the  
121 genome that are associated with H3K27me3 domains and overlapping H3K9me3/  
122 H3K27me3 domains: in total 951 of the *Z. tritici* species-specific genes locate in  
123 heterochromatic domains ( $X^2$  test,  $P < 0.01$ ; Table 1; Table S1). The *Z. tritici* genome  
124 encodes 874 putative effector genes and, interestingly, the species-specific genes are  
125 enriched in genes encoding putative effectors (177 representing 10.3% of the orphan  
126 genes;  $X^2$  test;  $P < 2.2 \cdot 10^{-6}$ ) of which 82 locate in H3K9me3 and / or H3K27me3 domains.

127 In the *Z. tritici* reference genome, 6,329 predicted genes could not be assigned to a  
128 protein function (i.e. no homology with proteins predicted in other organisms and/or no  
129 protein domain included in databases). Hereinafter, we refer to these as genes of  
130 "unknown function". We found a significant enrichment of genes of unknown function in  
131 the heterochromatic domains enriched with H3K27me3 or enriched with both H3K9me3  
132 and H3K27me3 ( $\chi^2$  test,  $P < 0.01$ ; Table 1; Table S2). Contrarily, genes associated with  
133 H3K4me2 were deprived of genes of unknown function compared to the rest of the  
134 genome ( $\chi^2$  test,  $P < 0.01$ ; Table S2). Taken together, these data suggest that  
135 heterochromatic DNA associates with less conserved genes, including many predicted to  
136 be secreted and involved in host-pathogen interactions.

137

138 H3K9me3 and H3K27me3 are associated with genes encoding putative pathogenicity  
139 determinants

140 Specific types of proteins are often associated with pathogenicity in fungi (for example  
141 proteinaceous effectors and proteins involved in secondary metabolite syntheses; Tyler  
142 and Rouxel, 2013). In some species, such as *Aspergilli*, secondary metabolite-encoding  
143 genes were found to be enriched in subtelomeric regions of the genome or near TEs  
144 (Gacek and Strauss, 2012). Furthermore, a chromatin-based regulation of these genes by  
145 post-translational histone modifications was demonstrated for gene clusters encoding  
146 polyketide synthase-like (PKS) proteins and non-ribosomal peptide synthase (NRPS) gene  
147 clusters, e.g. in the endophyte *E. festucae* (Chujo and Scott, 2014).

148 We assessed whether PKS and NRPS encoding genes are associated with the two  
149 heterochromatin marks studied here. In total, 2,498 predicted genes (21% of all genes)  
150 locate in heterochromatic domains during *in vitro* growth of *Z. tritici*. Among these, we  
151 identified several genes involved in secondary metabolism and detoxification, i.e. with a  
152 predicted function such as cytochrome P450, polyketide synthase or Major Facilitator  
153 Superfamily (MFS) transporters. More precisely, 11 genes of the *Z. tritici* genome were  
154 annotated as PKS and nine as NRPS encoding genes (Ohm *et al.*, 2012; Grandaubert *et al.*,  
155 2015). PKS/NRPS encoding genes are significantly enriched in H3K27me3 domains as  
156 identified during *in vitro* growth of the fungus ( $\chi^2$  test,  $P < 0.01$ , Table 1; Table S1).

157 We next used a PFAM enrichment analysis (Finn *et al.*, 2014) to assess if genes encoding  
158 proteins involved in biosynthetic activities were also enriched in heterochromatic  
159 domains of the *Z. tritici* genome. We found that H3K27me3 and H3K9me3 domains are  
160 significantly enriched in genes involved in biosynthetic activities including genes encoding  
161 Rad51 PFAM domains known to be involved in DNA repair processes and genes encoding  
162 reverse transcriptases and transposases. Furthermore, genes located in H3K27me3  
163 domains are enriched in PFAM protein families involved in secondary metabolism (Tables  
164 S3-6; FDR < 0.01).

165 We also analyzed the location of 227 genes predicted to encode Carbohydrate-Active  
166 Enzymes (CAZymes) in the *Z. tritici* genome. Contrary to secondary metabolite genes,  
167 there is no significant enrichment of the CAZyme genes in heterochromatic domains ( $\chi^2$   
168 test,  $P > 0.01$ ; Table 1; Table S2).



169 In the pathogenic fungus *L. maculans*, effector genes showing stage-specific expression  
170 profiles during infection of oilseed rape (*Brassica napus*), are enriched in GC-poor or TE-  
171 rich genomic regions (Gervais *et al.*, 2017). Interestingly, the silencing of genes located in  
172 TE-rich regions, *in vitro*, involves a chromatin-based control via H3K9me3 (Soyer *et al.*,  
173 2014). We addressed whether TE-rich genomic regions and heterochromatic domains of  
174 the *Z. tritici* genome likewise are enriched in putative effector genes. The 874 predicted  
175 effector genes represent eight percent of all predicted genes in *Z. tritici* and only nine on  
176 the accessory chromosomes (1.04% of all genes predicted on the accessory  
177 chromosomes). We here refined our analyses to address the association of the 865  
178 putative effector genes of the core chromosomes and TEs. We considered a gene to be  
179 associated with TE regions if the gene locates within 2 kb distance of a TE. Assigning this  
180 criterion, we confirm that TE-rich regions of core chromosomes are enriched in putative  
181 effector genes (185 putative effector genes corresponding to 12.6% of the TE associated  
182 genes;  $\chi^2$  test,  $P < 0.01$ ; Table 2; Table S7; Figure 2). We also found a significant  
183 enrichment of putative effector genes in heterochromatic domains associated with TEs  
184 or not (H3K9me3, H3K27me3 and H3K9me3/H3K27me3 overlapping domains; Table 2;  
185 Table S7) while euchromatic domains are deprived of putative effector genes ( $\chi^2$  test,  $P <$   
186  $0.01$ ; Table S7). Altogether, our analysis suggests that genes encoding putative  
187 pathogenicity-determinants are non-randomly distributed in the genome of *Z. tritici* and  
188 in particular enriched in H3K27me3 and H3K9me3 domains *in vitro*.

189

190 *In vitro* heterochromatic domains are enriched with genes up-regulated upon plant  
191 infection

192 As genes predicted as putative pathogenicity determinants (PKS, NRPS, effector genes)  
193 appear not to be randomly located in the genome of *Z. tritici*, we hypothesize that  
194 regulation of the expression of these genes involves a chromatin-based control as shown  
195 for effectors in *L. maculans* (Soyer *et al.*, 2014). We therefore assessed the correlation of  
196 the genome-wide expression patterns in the *Z. tritici* isolate Zt09 with the distribution of  
197 genome-wide map of H3K4me2, H3K9me3 and H3K27me3 histone modifications  
198 observed during *in vitro* growth (Schotanus *et al.*, 2015). To this end, we processed  
199 transcriptomic data generated from axenic cultures and infected plant material from  
200 previous studies (Kellner *et al.*, 2014, Haueisen *et al.*, 2018).

201 During axenic growth, 9,412 genes are expressed with RPKM  $\geq 2$ . Ninety-eight percent  
202 (3,237) of the genes for which sequence is entirely associated with H3K4me2, 58% and  
203 39% of genes (i.e. 18 and 737 genes) associated with H3K9me3 or H3K27me3 respectively  
204 were expressed *in vitro* (RPKM  $\geq 2$ ). These patterns confirm that H3K4me2 is almost  
205 systematically associated with transcriptional activity while H3K9me3 and H3K27me3  
206 represent repressive histone modifications (Wilcoxon-test,  $P < 0.05$ ; Figure 3).

207 We then compared the transcriptomic profiles of Zt09 genes during host infection and  
208 assessed genome wide expression patterns at 4 and 13 days post inoculation (dpi), i.e.  
209 during early asymptomatic host infection and at the transition to necrotrophic growth,  
210 respectively. We analyzed 1) the number and distribution of genes silenced during *in vitro*

211 growth and induced during plant infection and 2) the number and distribution of genes  
212 significantly up- or down- regulated *in planta* compared to axenic culture (Figure 4).

213 We first analyzed genes specifically induced at 4 or 13 dpi compared to axenic culture (i.e.  
214  $RPKM \leq 2$  for the axenic culture and  $RPKM \geq 2$  at 4 or 13 dpi). Using these criteria we  
215 found 559 genes induced at 4 dpi, including 92 genes that locate in an *in vitro* H3K4me2  
216 domain and 149 in an *in vitro* H3K27me3 domain (the H3K4me2 domains comprise a total  
217 of 4,992 genes and H3K27me3 a total of 2,179 genes) (Table 1; Table S2). This pattern  
218 shows that H3K27me3 domains are enriched in genes specifically expressed at 4 dpi  
219 compared to axenic culture ( $X^2$  test,  $P < 0.01$ ; Table 1; Table S2). At 13 dpi, 886 genes, not  
220 expressed *in vitro*, are induced (i.e.  $RPKM \leq 2$  for the axenic culture and  $RPKM \geq 2$  at 13  
221 dpi), including 98 genes located in an *in vitro* H3K4me2 domain and 355 genes located in  
222 an *in vitro* H3K27me3 domain. For this later stage of infection, as for 4 dpi, we also found  
223 that genes specifically expressed at 13 dpi compared to axenic culture are enriched in  
224 genes associated with *in vitro* H3K27me3 domains ( $X^2$  test,  $P < 0.01$ ; Table 1; Table S2).

225 We next analyzed genes up-regulated *in planta* compared to the axenic culture (log2 Fold  
226 Change ( $RPKM$ )  $\geq 1$  and  $FDR \leq 0.001$ ). At 4 dpi, 784 genes were significantly up-regulated  
227 compared to the axenic growth. These up-regulated genes are significantly enriched in  
228 genes encoding effector candidates (114 putative effector genes of all up-regulated genes  
229 at 4 dpi;  $X^2$  test,  $P < 0.01$ ; Table 2; Table S7). However, during early infection, up-regulated  
230 genes are not significantly associated with any of the histone modifications investigated  
231 here. At 4 dpi, there is no effect of the *in vitro* location in H3K4me2, H3K9me3 or

232 H3K27me3 on the up- or down-regulation of genes (Table 1; Table S2; Figure 4A). At 13  
233 dpi, 1,773 genes were specifically up-regulated compared to 4 dpi, including 388 genes  
234 and 507 genes located respectively in a H3K4me2 and in a H3K27me3 domain *in vitro*. As  
235 for 4 dpi, up-regulated genes were significantly enriched in effector genes (309 putative  
236 effector genes;  $\chi^2$  test,  $P < 0.01$ ; Table 2, Table S7). At 13 dpi, transcription of the genes  
237 located in an *in vitro* heterochromatic domain is significantly different from genes located  
238 in an *in vitro* euchromatic domain (Wilcoxon test,  $P < 2.2 \cdot 10^{-16}$ ; Figure 4B). We observe  
239 that genes showing low, or no, expression *in vitro* and associated with a histone  
240 modification typical for heterochromatin in this growing condition are significantly higher  
241 expressed at the switch to necrotrophy than genes associated *in vitro* with euchromatin  
242 (Table 1; Table S2). Up-regulated effector genes were likewise enriched in genes located  
243 in the vicinity of TEs (i.e. distance  $\leq 2$  kb) and H3K27me3 *in vitro* (Table 2; Table S7). Taken  
244 together, these data show that although sets of putative effector genes were highly  
245 expressed both 4 dpi and 13 dpi, the histone modifications associated with the genes  
246 possibly influences their expression only at the switch to necrotrophy.

247

248 *KMT1*, *KMT6* or *KMT1/KMT6* deletions deregulate expression of pathogenicity-related  
249 genes

250 In *Z. tritici*, *kmt1*, *kmt6* and *kmt1/kmt6* mutants were generated and gene expression was  
251 analyzed, *in vitro*, using RNA-seq (Moeller *et al.*, 2018). We processed these data to  
252 address whether KMT1 and / or KMT6 may influence pathogenesis-related genes.

253 Among the 100 most up-regulated genes in respectively the *kmt1*, *kmt6* and *kmt1/kmt6*  
254 mutants, 59, 36 and 32% are over-expressed at 13 dpi compared to axenic culture in the  
255 WT strain suggesting that both histone methyltransferases are involved in regulation of  
256 genes highly expressed in the WT strain upon infection. We analyzed whether certain  
257 categories of genes were significantly enriched among the deregulated genes in the  
258 mutant background (Table 3). *KMT1* deletion induces the reorganization of H3K27me3  
259 modification with a relocation of this modification to H3K9me3 regions (Moeller *et al.*,  
260 2018). Hence, genes located in H3K9me3 are not significantly induced because of  
261 H3K9me3 loss as they may still be repressed by the H3K27me3 modification (Table 3).  
262 However, consistently with the relocation of H3K27me3, genes located in a H3K27me3  
263 domain in the WT are significantly induced in the *kmt1* mutant (Table 3). We identified  
264 that deregulated genes in the *kmt1*, *kmt6* or *kmt1/kmt6* mutants were significantly  
265 enriched in SP-genes (i.e. 220 putative effectors within the 2,110 deregulated genes) and  
266 genes associated with TE sequences while no significant association of the CAZymes  
267 encoding genes was observed (Table 3;  $\chi^2$  test,  $P < 0.01$ ). Particularly, the 972 genes up-  
268 regulated in at least one of the mutants include 118 putative effector genes. Deletions of  
269 *KMT1* and *KMT6* also significantly influenced expression of genes otherwise found to be  
270 induced during infection in the WT strain (Table 3). Genes up-regulated at 4 dpi compared  
271 to axenic culture, or 13 dpi compared to 4 dpi, in the WT strain are also significantly  
272 enriched in the deregulated genes in the different mutants (231 out of the 784 genes up-  
273 regulated at 4 dpi and 646 out of the 1,773 genes up-regulated at 13 dpi are deregulated  
274 in the mutants).

275 We analyzed the expression of a few randomly selected genes based on their location in  
276 a heterochromatin domain *in vitro*, by RT-qPCR, in *kmt1*, *kmt6* and *kmt1/kmt6* deletion  
277 mutants. Some of these genes are putative effector genes or orphan genes and some are  
278 up-regulated in the WT at 13 dpi compared to early infection (4 dpi) in wheat (Table 4).  
279 One gene located in a H3K27me3 domain was not influenced by none of the deletion  
280 (gene ID Zt09\_chr\_3\_00231) while all other genes had their expression up-regulated due  
281 to the deletion of at least *KMT1*, *KMT6* or both.

282 Up-regulation of effector candidate genes *in planta* is associated with changes in  
283 chromatin structure

284 The analysis of *in vitro* ChIP-seq data and *in planta* RNA-seq data indicates that chromatin  
285 modifications might contribute to the expression of pathogenicity related genes. *KMT1*  
286 and *KMT1/KMT6* deletions resulted in impaired *in vitro* growth and host colonization is  
287 consistently reduced compared to the WT while *KMT6* deletion only slightly reduced  
288 infection abilities. In all deletion backgrounds no large effect on gene expression was  
289 observed (Moeller *et al.*, 2018). Analyses of gene expression in *KMT1* or *KMT6* mutants  
290 appear not to be the most appropriate approach to disentangle influence of histone  
291 modifications on the regulation of pathogenicity related genes. Therefore, we further  
292 investigated histone modification dynamics, *in planta*, in the WT strain. We investigated  
293 whether the up-regulation of putative effector genes at 13 dpi is associated with a  
294 difference in the histone methylation patterns between *in vitro* and *in planta* growth. We  
295 compared the histone methylation patterns in the genomic sequence of different genes

296 that are lowly expressed *in vitro* and up-regulated during the lifestyle switch *in planta*,  
297 using ChIP-qPCR. The histone H4 encoding gene, constitutively expressed, and a  
298 transposable element, constitutively silenced (the DNA transposon, DTH\_element  
299 5\_ZTIPO323, located on chromosome 9;) were used as controls in the experiment.

300 The three selected genes (Zt09\_chr\_5\_00271; Zt09\_chr\_6\_00192; Zt09\_chr\_9\_00038)  
301 encode putative effectors among the 10 most expressed genes in *Z. tritici* at 13 dpi and  
302 these are considerably less expressed *in vitro* compared to the histone H4 gene (Table  
303 S8). The putative effector gene Zt09\_chr\_9\_00038 encodes a hydrophobin-like protein  
304 considered to be a “core” necrotrophic effector, i.e. conserved in different isolates of *Z.*  
305 *tritici* (Haeuiseu *et al.*, 2018). Using ChIP-qPCR, we confirm the *in vitro* association of the  
306 five genes with H3K4me2, H3K9me3 or H3K27me3 (“% of input” method). Consistently,  
307 the histone H4 encoding gene was associated with H3K4me2 while the TE sequence was  
308 associated with H3K9me3 and H3K27me3 and the three putative effector genes were  
309 located in heterochromatic domains (H3K9me3 or H3K27me3) *in vitro* (Figure 5; Table  
310 S8).

311 For the *in planta* material, we confirmed the chromatin immunoprecipitation by a qPCR  
312 targeting the wheat Actin gene (Genebank accession number KC775780.1, cultivar BR34)  
313 at 13 dpi. We validated that there was no product for the wheat actin primers in the ChIP  
314 samples generated from fungal axenic culture. The abundance of H3K4me2 for the wheat  
315 actin gene was considerably higher compared to levels of H3K9me3 and H3K27me3  
316 (Figure S1). In order to compare values obtained for the fungal genes *in vitro* and *in planta*,

317 we calculated enrichment values of the targeted genes relatively to the fungal histone H4  
318 gene. We firstly confirmed that this method led to the same conclusion as the "% input"  
319 method (Figure 5 and Table S8). Furthermore, we checked the difference in terms of  
320 enrichment between the gene promoter and the coding sequence: we applied qPCR  
321 following ChIP targeting the upstream gene sequence and the coding region of the gene  
322 Zt09\_chr\_6\_00192. The levels of H3K4me2, H3K9me3, H3K27me3 shows the same profile  
323 across the promoter and coding sequence, i.e. level of any histone modifications is  
324 similarly high or low for the upstream gene sequence or the coding region of the gene  
325 (Figure 6) between the promoter and the coding sequence of a gene.

326 At 13 dpi, the three targeted effector genes are highly expressed (Table S8) and the  
327 relative enrichment of H3K4me2 remained low compared to histone H4 gene (% of  
328 H3K4me2 enrichment for these genes compared to histone H4 < 0.2). On the contrary,  
329 the levels of H3K9me3 decreased (a relative 3-fold lower amount of H3K9me3) for the  
330 genes Zt09\_chr\_5\_00271 and Zt09\_chr\_9\_00038. For two genes located in H3K27me3 *in*  
331 *vitro* (Zt09\_chr\_9\_00038 and Zt09\_chr\_6\_00192), levels of H3K27me3 were 6-22 fold  
332 lower at 13 dpi compared to axenic culture. This suggests that the up-regulation of these  
333 genes at 13 dpi is associated with a remodeling of the underlying chromatin structure in  
334 their genomic sequence (Figure 6) and that the influence of the chromatin structure on  
335 effector gene expression is due to a decrease of the heterochromatin marks rather than  
336 an increase of the euchromatic mark investigated here.

337 We have assessed the levels of H3K4me2, H3K9me3 and H3K27me3 for the TE relatively



338 to the histone H4 gene: levels of H3K9me3 and H3K27me3 decreased compared to the  
339 levels *in vitro* but remained very high when compared to histone H4 and the three tested  
340 putative effector genes, which are up-regulated at this stage. Assessment of the  
341 chromatin state at the genomic loci of these genes confirms that constitutively expressed  
342 genes, such as the histone H4 gene, remain associated with the euchromatic modification  
343 H3K4me2 while the expression changes of the three effector genes tested are associated  
344 with changes of the associated histone modifications during wheat infection. This data  
345 provide evidence of an involvement of chromatin dynamics for the *in planta* regulation of  
346 secreted protein encoding genes putatively involved in pathogenicity.

347

## 348 **Discussion**

349 In some plant pathogenic fungi, including *Z. tritici*, the expression profiles of effector  
350 genes was shown to be highly dynamic during host infection. By correlating genomic  
351 coordinates of predicted effector genes to transcriptome and epigenome data, we here  
352 provide evidence for a role of a chromatin-based gene regulation during plant infection  
353 of *Z. tritici*. In particular, candidate effector genes up-regulated during the transition from  
354 asymptomatic to necrotrophic growth are significantly enriched in regions of the genome  
355 that are transcriptionally silenced by a heterochromatin structure of the DNA during  
356 axenic growth. In this study, we analyzed levels of different histone modifications typical  
357 for heterochromatin or euchromatin *in planta* by applying CHIP-qPCR targeting the  
358 genomic loci of three effector genes that are among the most up-regulated genes at 13

359 dpi. Our experimental work provides evidence that histone modifications H3K9me3 and  
360 H3K27me3 play a role for the transcriptional regulation of putative effector genes in *Z.*  
361 *tritici* during wheat infection. Our targeted analysis *in planta* thereby suggests that the  
362 dynamic expression of effector genes can be associated with a dynamic of the  
363 heterochromatin marks H3K9me3 and H3K27me3.

364

365 ***Genes located in a heterochromatin domain in vitro are enriched in putative virulence***  
366 ***related genes***

367 In other species, such as *L. maculans*, *Fusarium oxysporum*, Aspergilli species, genes  
368 located in regions that are TE-rich, subtelomeric, lineage-specific, are often enriched in  
369 genes encoding putative effectors or genes involved in secondary metabolite production  
370 (Rouxel *et al.*, 2011; Grandaubert *et al.*, 2014; Ma *et al.*, 2010; Faino *et al.*, 2016;  
371 Vlaardingerbroek *et al.*, 2016). We find here that TE-rich genomic compartments of *Z.*  
372 *tritici* encode species-specific genes and genes encoding putative effector proteins. The  
373 fact that TE-rich regions are enriched in species-specific genes was also shown at the  
374 within species level (Plissonneau *et al.*, 2016). Interestingly, while the *Z. tritici* reference  
375 strains presents eight accessory chromosomes which contain twice as much TEs as the  
376 core chromosomes, they are not enriched in putative secreted protein encoding genes as  
377 only nine are located on the accessory chromosomes. Genes encoding other types of  
378 pathogenicity related genes such as PKS and NRPS were also enriched in H3K27me3  
379 domains of core chromosomes. Together, these data show that in *Z. tritici*, pathogenicity-

380 related genes and genes involved in host specificity are enriched in repeat-rich,  
381 heterochromatic regions on the core chromosomes.

382

383 ***Genes highly expressed at the lifestyle switch towards necrotrophy are enriched in***  
384 ***genes located in heterochromatin in vitro and in effector candidates***

385 Using our previous RNA-seq data generated *in vitro* and at 4 and 13 dpi (Kellner *et al.*,  
386 2014; Haueisen *et al.*, 2018), we investigated patterns of gene expression as a function of  
387 their location in euchromatin or a heterochromatin domain *in vitro*. Genes over-  
388 expressed at 4 dpi compared to axenic culture and at 13 dpi compared to 4 dpi are  
389 enriched in putative pathogenicity-related genes. Interestingly, we found that genes  
390 highly expressed at the onset of the infection are not enriched in *in vitro* H3K4me2,  
391 H3K9me3 or H3K27me3 domains. However, genes highly expressed at the switch to  
392 necrotrophic growth are, *in vitro*, associated with TE sequences and H3K9me3 and  
393 H3K27me3. The different relevance of H3K9me3 and H3K27me3 at the two studied  
394 infection stages suggests that the pattern of histone modifications is dynamic during  
395 infection, and possibly influenced by signals from the host tissue and / or by fungal  
396 development *in planta*. It is possible that transcription of the genes highly expressed  
397 during the second wave of effector gene expression remains suppressed during early host  
398 infection to avoid induction of host immune responses. During early host infection,  
399 specific effectors are likely relevant to suppress the plant immune system upon host  
400 penetration and biotrophic fungal establishment.

401 Recently, functional analyses in *Z. tritici* have identified two genes encoding avirulence  
402 proteins (i.e., effector that can be recognized by the immune system of the plant  
403 activating defense reactions): *Avr3D1* and *AvrStb6*, over-expressed during wheat  
404 infection just before the switch to necrotrophic growth (Zhong *et al.*, 2017; Meile *et al.*,  
405 2018). In our ChIP-seq data, *AvrStb6*, located in a subtelomeric region, is associated with  
406 H3K9me3 and H3K27me3 while *Avr3D1*, located close to repetitive sequences, is  
407 associated with H3K27me3. Some of the genes encoding candidate necrosis inducing  
408 proteins, highly expressed at the switch to necrotrophy, identified in a previous study  
409 (Ben M'Barek *et al.*, 2015) are also associated with heterochromatin domains *in vitro*, for  
410 instance genes Zt09\_chr\_5\_00190 or Zt09\_chr\_2\_01243. The association of these genes  
411 with H3K27me3 or TEs and their expression patterns support our findings drawn at the  
412 genome wide scale.

413

414 ***The histone modification patterns is dynamic between in vitro and in planta stages for***  
415 ***a few effector genes, influencing their expression***

416 The role of the chromatin structure for the regulation of effector genes in TE-rich regions  
417 has been investigated in *L. maculans*, whereby RNAi-silenced transformants were  
418 generated for genes encoding HP1 and KMT1, two players involved in heterochromatin  
419 assembly and maintenance (Soyer *et al.*, 2014). In this fungus, silencing of *HP1* and *KMT1*  
420 led to an up-regulation of genes located in TE-rich regions, notably effector genes,  
421 correlated with a decrease in H3K9me3 (Soyer *et al.*, 2014). The same experimental

422 strategy was applied to investigate the role of histone modifications for the regulation of  
423 secondary metabolite-encoding genes in other fungal species including *F. graminearum*,  
424 *E. festucae* and Aspergilli species (Reyes-Dominguez *et al.*, 2012; Chujo and Scott, 2014;  
425 Gacek-Matthews *et al.*, 2015; Gacek-Matthews *et al.*, 2016). In *E. festucae*, ChIP-qPCR was  
426 also applied *in planta* to analyze histone modification patterns at the genomic loci of  
427 secondary metabolite gene clusters located in subtelomeric areas. In *Fusarium fujikuroi*,  
428 deletion of the H3K36 methyltransferase or *KMT6* resulted in deregulation (either up- or  
429 down-regulation) of some secondary metabolite gene clusters (Janevska *et al.*, 2018;  
430 Studt *et al.*, 2016). These studies, together with other analyzing gene expression at the  
431 genome-wide scale in plant pathogenic fungi (Connolly *et al.*, 2013; Soyer *et al.*, 2014;  
432 Moeller *et al.*, 2018) show that loss of histone methyltransferases result in derepression  
433 of some genes associated with the histone modifications while a fraction remains silenced  
434 suggesting that a very complex regulatory network is involved in their transcriptional  
435 control. As in Soyer *et al.* (2014), our analysis of gene expression in *KMT1*, *KMT6* mutants  
436 of *Z. tritici* (Moeller *et al.*, 2018; our study) has shown that pathogenicity-related encoding  
437 genes and genes expressed upon infection, are enriched within the deregulated genes  
438 due to at least one of the deletion. In order to analyze influence of histone modifications  
439 in the WT context and during plant infection, we applied for the first time ChIP-qPCR *in*  
440 *planta* to analyze levels of H3K4me2, H3K9me3 and H3K27me3 of three genes encoding  
441 effector candidates which are highly expressed at 13 dpi, as well as the constitutively  
442 expressed histone H4 gene and a transposable element sequence. We could demonstrate  
443 that levels of H3K4me2, H3K9me3 and H3K27me3 for each targeted loci correlated with

444 their expression *in vitro* and at 13 dpi. For the repetitive element, levels of H3K9me3 and  
445 H3K27me3 were high *in vitro* as well as *in planta* likely reflecting the efficient silencing of  
446 TEs in some regions of the genome. However, effector genes associated with a high level  
447 of H3K9me3 and H3K27me3 *in vitro* showed significantly reduced levels of these marks *in*  
448 *planta* consistent with their strong up-regulation. This indicates that the chromatin  
449 structure is dynamic between axenic culture and different infectious stages and  
450 instrumental for regulation of gene expression, notably of at least some effector genes in  
451 *Z. tritici*.

452 In conclusion, our study indicates a prominent role of chromatin-based gene regulation  
453 during wheat infection of *Z. tritici*. The close association of putative effector genes with  
454 repeat-rich DNA may facilitate rapid evolution of these genes. Furthermore, the  
455 association with heterochromatin in these genomic compartments provides variability at  
456 the transcriptional level possibly further facilitating the defeat of host defenses by this  
457 important wheat pathogen.

458

## 459 **Experimental Procedures**

### 460 Fungal strain and plant cultivar

461 The *Z. tritici* isolate Zt09 was used throughout the study. Zt09 is derived from the  
462 reference isolate IPO323, and differs by the absence of chromosome 18, lost during *in*  
463 *vitro* culture (Kellner *et al.*, 2014). Cultures were grown on solid yeast malt sucrose (YMS)

464 agar (4 g yeast extract, 4 g malt extract, 4 g sucrose, 20 g bacto agar, 1 liter H<sub>2</sub>O) at 18°C  
465 in the dark. For the *in planta* experiments conducted in this study, *Triticum aestivum*  
466 cultivar Obelisk (Wiersum Plantbreeding, Winschoten, the Netherlands) was used. The  
467 *kmt1*, *kmt6* and *kmt1/kmt6* mutants were generated by Moeller *et al.* (2018).

468

#### 469 Identification of genes associated with specific histone modifications

470 The annotation of the *Z. tritici* isolate presented in Grandaubert *et al.* (2015) was used in  
471 this study including genes predicted to encode putative effectors and Polyketide  
472 Synthases/NonRibosomal Peptide Synthetases. To distinguish genes associated with the  
473 different histone marks H3K4me<sub>2</sub>, H3K9me<sub>3</sub> and H3K27me<sub>3</sub>, we used previously  
474 generated *in vitro* ChIP-seq datasets (Schotanus *et al.*, 2015) available under the SRA  
475 accession number SRP059394. The Integrative Genome Viewer (IGV;  
476 <http://www.broadinstitute.org/software/igv>; Thorvaldsdóttir *et al.*, 2013) was used to  
477 visualize location of each domains along the genome. Statistically enriched regions were  
478 identified with RSEG (Song and Smith, 2011). We determined the *in vitro* chromatin state  
479 of each annotated gene using the previously published chromatin maps (Schotanus *et al.*,  
480 2015). Genes were considered to be associated with a given post-translational histone  
481 modification when partially (at least one bp) or completely located in a H3K4me<sub>2</sub>,  
482 H3K9me<sub>3</sub> or H3K27me<sub>3</sub> domain. A Chi<sup>2</sup> test was applied to identify statistical enrichment  
483 of euchromatic or heterochromatic domains for certain categories of genes: the expected  
484 proportion of a given category of genes across the entire genome was compared to the

485 observed distribution of the gene category in the H3K4me2, H3K9me3 or H3K27me3  
486 domains. Enrichment was considered significant with a  $P$  value  $< 0.01$ . All analyses were  
487 done in R ([www.r-project.org](http://www.r-project.org)).

488

#### 489 RNA-sequencing datasets

490 To correlate gene expression with location in a given chromatin domain during *Z. tritici*  
491 infection of wheat, we used previously generated *in vitro* and *in planta* (four and 13 dpi)  
492 RNA-seq datasets of Zt09 (Kellner *et al.*, 2014; Haueisen *et al.*, 2018). RNA-seq data from  
493 the *in vitro* grown cultures and the *in planta* stages are accessible at the NCBI Gene  
494 Expression Omnibus respectively through accession number GSE54874 and GSE106136  
495 (Kellner *et al.*, 2014; Haueisen *et al.*, 2018). RNA-seq data from the *kmt1*, *kmt6* and  
496 *kmt1/kmt6* mutants during *in vitro* growth were generated by Moeller *et al.* (2018) and  
497 at Sequence Read Archive under BioProject ID PRJNA494102.

498 RPKM values for each gene in a given condition were estimated using Cufflinks (Trapnell  
499 *et al.*, 2010) as already described in Kellner *et al.* (2014). The total read counts per  
500 transcript were estimated in HTSeq using the intersection-strict mode (Anders *et al.*,  
501 2015) and genes differentially expressed were identified with the EdgeR package  
502 (Robinson *et al.*, 2010) with a log<sub>2</sub> Fold Change  $\leq -1$  or  $\geq 1$  and an associated false  
503 discovery rate  $\leq 0.001$  (McCarthy *et al.*, 2012). As previously conducted in a study of gene  
504 expression in *Z. tritici* (Kellner *et al.*, 2014), we only included genes with an RPKM value  $\geq$   
505 2 in the condition in which the gene is up-regulated.



506

507 Plant experiments for chromatin immunoprecipitation quantitative PCR analyses

508 Plant infections were done as previously described (Habig *et al.*, 2017). In brief, the  
509 second leaves of wheat seedlings were inoculated with a solution containing  $1.10^7$   
510 cells/ml supplemented with 0.1% Tween by brushing an area of seven cm after 11 days of  
511 seedling growth. Plant material was harvested four and 13 dpi for ChIP-qPCR. As a control,  
512 non-inoculated leaves were also harvested four and 13 dpi.

513

514 Chromatin immunoprecipitation (ChIP) and quantitative PCR (qPCR)

515 ChIP with antibodies against H3K4me2, H3K9me3 and H3K27me3 was performed on cells  
516 from axenic cultures as previously described (Soyer *et al.*, 2015). For *in planta* ChIP, 12  
517 infected leaves were harvested (i.e. three leaves and four technical replicates) at 13 dpi  
518 and the same protocol was used except that “native ChIP” (without formaldehyde  
519 crosslinking) was applied from 100 mg of infected plant material. All DNA extractions were  
520 done with the Wizard® SV Gel and PCR Clean Up system kit (Promega, Madison, USA).

521 Based on our analyses of transcriptome, genome and ChIP-seq data, we selected three  
522 candidate genes for ChIP-qPCR analyses: Zt09\_chr\_5\_00271, Zt09\_chr\_6\_00192,  
523 Zt09\_chr\_9\_00038. These genes are lowly expressed *in vitro* and among the 10 most  
524 expressed genes in *Z. tritici* 13 dpi of wheat. Moreover, they are associated with  
525 heterochromatin during *in vitro* growth (Table S8; Schotanus *et al.*, 2015). Furthermore,

526 we included the sequence of a transposable element (DTH\_element5\_ZTIPO323, located  
527 on chromosome 9, position 29,065-30,735) as well as the gene encoding histone H4 (ID  
528 Zt09\_chr\_6\_00256) as controls for precipitation with anti-H3K9me3, anti-H3K27me3  
529 antibodies and anti-H3K4me2 antibody, respectively.

530 Quantitative PCR (qPCR) was performed with SYBR Green PCR Master Mix (Applied  
531 Biosystem, Foster City, USA) on a 7900 Real Time PCR System (Applied Biosystems). Two  
532 biological replicates, and two technical replicates were processed. Primers were designed  
533 with the OligoPerfect Designer (ThermoFisher Scientific) to target amplification of  
534 products between 80 and 150 bp (Table S9). The efficiency of PCR primers was verified on  
535 genomic DNA as described previously (Taylor *et al.*, 2010). For RT-qPCR, Ct values were  
536 analyzed as described in Muller *et al.* (2002) for analysis of expression profiles and the  
537 Glyceraldehyde-3-phosphate dehydrogenase (GAPDH)-encoding gene (ID  
538 Zt09\_chr\_2\_00354) was used as a constitutively expressed reference gene, as in Poppe *et*  
539 *al.* (2015). A positive control for the *in planta* CHIP experiment was obtained by qPCR  
540 amplification of the wheat actin gene (Table S9). For qPCR after *in vitro* CHIP, the  
541 immunoprecipitated fraction of each gene was calculated by the “% of input” method (Lin  
542 *et al.*, 2012). Following the qPCR experiment, the Ct values (number of cycles required for  
543 the fluorescent signal to cross the threshold) were retrieved from the 7900 SDS software.  
544 To compare enrichment of the histone modifications H3K4me2, H3K9me3, and  
545 H3K27me3 for each target gene *in vitro* and *in planta*, we compared Ct values of the target  
546 genes to Ct values of a reference gene, histone H4 (i.e., for example,  $\Delta Ct_{H3K4me2} = Ct$   
547 gene H3K4me2 – Ct histone H4 H3K4me2). The same calculation was applied for the

548 histone H4 gene, therefore  $\Delta Ct = 1$  for each modification for this gene. Finally, the  
549 enrichment of each target gene with the three histone modifications was calculated as  
550 described by Lin *et al.* (2012) using  $\%H3K4me2 = 100/2^{\Delta Ct}$ . This enrichment was compared  
551 for each gene *in vitro* and *in planta* (at 13 dpi).

552

### 553 **Acknowledgments**

554 The authors thank members from the “Environmental Genomics” group, in particular  
555 Mareike Moeller, and J.Y. Dutheil, for fruitful discussion. J.L. Soyer was funded by a Young  
556 Scientist Funding by INRA. The study was supported by a Max Planck fellowship to EHS.

557

### 558 **Author contributions**

559 Conceived and designed the experiments: JLS, JG, EHS. Acquisition, analysis or  
560 interpretation of the data: JLS, JG, JH, KS, EHS. Writing of the manuscript: JLS, EHS.

561

### 562 **References**

563 **Anders, S., Pyl, P.T. and Huber, W.** (2015) HTSeq--a Python framework to work with  
564 high-throughput sequencing data. *Bioinformatics*, **31**, 166–169.

565 **Ben M'Barek, S., Cordewener, J.H., Tabib Ghaffary, S.M., van der Lee, T.A., Liu, Z.,**  
566 **Mirzadi Gohari, A., Mehrabi, R., America, A.H., Robert, O., Friesen, T.L., Hamza, S.,**  
567 **Stergiopoulos, I., de Wit, P.J. and Kema, G.H.** (2015) FPLC and liquid-chromatography

568 mass spectrometry identify candidate necrosis-inducing proteins from culture filtrates of  
569 the fungal wheat pathogen *Zymoseptoria tritici*. *Fungal Genet. Biol.* **79**, 54–62.

570 **Chujo, T. and Scott, B.** (2014) Histone H3K9 and H3K27 methylation regulates fungal  
571 alkaloid biosynthesis in a fungal endophyte-plant symbiosis. *Mol. Microbiol.*, **92**, 413–434.

572 **Connolly, L.R., Smith, K.M. and Freitag, M.** (2013) The *Fusarium graminearum*  
573 histone H3K27 methyltransferase KMT6 regulates development and expression of  
574 secondary metabolite gene clusters. *PLoS Genet.*, **9**, e1003916.

575 **Dhillon, B., Gill, N., Hamelin, R. and Goodwin, S.B.** (2014) The landscape of  
576 transposable elements in the finished genome of the fungal wheat pathogen  
577 *Mycosphaerella graminicola*. *BMC Genomics*, **15**, 1132.

578 **Faino, L., Seidl, M.F., Shi-Kunne, X., Pauper, M., van den Berg, G.C.M., Wittenberg,**  
579 **A.H.J. and Thomma, B.P.** (2016) Transposons passively and actively contribute to  
580 evolution of the two-speed genome of a fungal pathogen. *Genome Res.*, **26**, 1091–1100.

581 **Finn, R.D., Bateman, A., Clements, J., Coggill, P., Eberhardt, R.Y., Eddy, S.R., Heger,**  
582 **A., Hetherington, K., Holm, L., Mistry, J., Sonnhammer, E.L., Tate, J. and Punta, M.** (2014)  
583 Pfam: the protein families database. *Nucleic Acids Res.*, **42**, D222–230.

584 **Gacek, A. and Strauss, J.** (2012) The chromatin code of fungal secondary metabolite  
585 gene clusters. *Appl. Microbiol. Biotechnol.*, **95**, 1389–1404.

586 **Gacek-Matthews, A., Noble, L.M., Gruber, C., Berger, H., Sulyok, M., Marcos, A.T.,**  
587 **Strauss, J. and Andrianopoulos, A.** (2015) KdmA, a histone H3 demethylase with bipartite

588 function, differentially regulates primary and secondary metabolism in *Aspergillus*  
589 *nidulans*. *Mol. Microbiol.*, **96**, 839–860.

590 **Gacek-Matthews, A., Berger, H., Sasaki, T., Wittstein, K., Gruber, C., Lewis, Z.A. and**  
591 **Strauss, J.** (2016) KdmB, a Jumonji histone H3 demethylase, regulates genome-wide H3K4  
592 trimethylation and is required for normal induction of secondary metabolism in  
593 *Aspergillus nidulans*. *PLoS Genet.*, **12**, e1006222.

594 **Gervais, J., Plissonneau, C., Linglin, J., Meyer, M., Labadie, K., Cruaud, C., Fudal, I.,**  
595 **Rouxel, T. and Balesdent, M.H.** (2017) Different waves of effector genes with contrasted  
596 genomic location are expressed by *Leptosphaeria maculans* during cotyledon and stem  
597 colonization of oilseed rape. *Mol. Plant Pathol.*, **18**, 1113–1126.

598 **Goodwin S.B., M'barek S.B., Dhillon B., Wittenberg A.H., Crane C.F., Hane J.K.,**  
599 **Foster, A.J., Van der Lee, T.A., Grimwood, J., Aerts, A., Antoniw, J., Bailey, A., Bluhm, B.,**  
600 **Bowler, J., Bristow, J., van der Burgt, A., Canto-Canché, B., Churchill, A.C., Conde-**  
601 **Ferràez, L., Cools, H.J., Coutinho, P.M., Csukai, M., Dehal, P., De Wit, P., Donzelli, B., van**  
602 **de Geest, H.C., van Ham, R.C., Hammond-Kosack, K.E., Henrissat, B., Kilian, A.,**  
603 **Kobayashi, A.K., Koopmann, E., Kourmpetis, Y., Kuzniar, A., Lindquist, E., Lombard, V.,**  
604 **Maliepaard, C., Martins, N., Mehrabi, R., Nap, J.P., Ponomarenko, A., Rudd, J.J.,**  
605 **Salamov, A., Schmutz, J., Schouten, H.J., Shapiro, H., Stergiopoulos, I., Torriani, S.F., Tu,**  
606 **H., de Vries, R.P., Waalwijk, C., Ware, S.B., Wiebenga, A., Zwiers, L.H., Oliver, R.P.,**  
607 **Grigoriev, I.V. and Kema, G.H.** (2011) Finished genome of the fungal wheat pathogen  
608 *Mycosphaerella graminicola* reveals dispensome structure, chromosome plasticity, and

609 stealth pathogenesis. *PLoS Genet.*, **7**, e1002070.

610 **Grandaubert, J., Lowe, R.G., Soyer, J.L., Schoch, C.L., Van de Wouw, A.P., Fudal I.,**  
611 **Robbertse, B., Lapalu, N., Links, M.G., Ollivier, B., Linglin, J., Barbe, V., Mangenot, S.,**  
612 **Cruaud, C., Borhan, H., Howlett, B.J., Balesdent, M.H. and Rouxel T.** (2014) Transposable  
613 element-assisted evolution and adaptation to host plant within the *Leptosphaeria*  
614 *maculans-Leptosphaeria biglobosa* species complex of fungal pathogens. *BMC Genomics*,  
615 **15**, 891.

616 **Grandaubert, J., Bhattacharyya, A. and Stukenbrock, E.H.** (2015) RNA-seq-based  
617 gene annotation and comparative genomics of four fungal grass pathogens in the genus  
618 *Zymoseptoria* identify novel orphan genes and species-specific invasions of transposable  
619 elements. *G3 (Bethesda)*, **5**, 1323–1333.

620 **Habig, M., Quade, J. and Stukenbrock, E.H.** (2017) Forward genetics approach  
621 reveals host genotype-dependent importance of accessory chromosomes in the fungal  
622 wheat pathogen *Zymoseptoria tritici*. *MBio*, **8**, 6.

623 **Hacquard, S., Joly, D.L., Lin, Y.C., Tisserant, E., Feau, N., Delaruelle, C., Legué, V.,**  
624 **Kohler, A., Tanguay, P., Petre, B., Frey, P., Van de Peer, Y., Rouzé, P., Martin, F., Hamelin,**  
625 **R.C. and Duplessis, S.** (2012) A comprehensive analysis of genes encoding small secreted  
626 proteins identifies candidate effectors in *Melampsora larici-populina* (poplar leaf rust).  
627 *Mol. Plant Microbe Interact.*, **25**, 279–293.

628 **Haueisen, J., Moeller, M., Eschenbrenner, C.J., Grandaubert, J., Seybold, H.,**

629 **Adamiak, H. and Stukenbrock, E.H.** (2018) Highly flexible infection programs in a  
630 specialized wheat pathogen. *Ecol. Evol.*, **9**, 275-294.

631 **Jamieson, K., Rountree, M.R., Lewis, Z.A., Stajich, J.E. and Selker, E.U.** (2013)  
632 Regional control of histone H3 lysine 27 methylation in *Neurospora*. *Proc. Natl. Acad. Sci.*  
633 *U S A.*, **110**, 6027–6032.

634 **Janevska, S., Baumann, L., Sieber, C.M.K., Münsterkötter M., Ulrich, J., Kämper, J.,**  
635 **Güldener, U. and Tudzynski, B.** (2018) Elucidation of the two H3K36me3 histone  
636 methyltransferases Set2 and Ash1 in *Fusarium fujikuroi* unravels their different  
637 chromosomal targets and a major impact of Ash1 on genome stability. *Genetics.*, **208**,  
638 153–171.

639 **Kellner, R., Bhattacharyya, A., Poppe, S., Hsu, T.Y., Brem, R.B. and Stukenbrock,**  
640 **E.H.** (2014) Expression profiling of the wheat pathogen *Zymoseptoria tritici* reveals  
641 genomic patterns of transcription and host-specific regulatory programs. *Genome Biol.*  
642 *Evol.*, **6**, 1353–1365.

643 **Lin, X., Tirichine, L. and Bowler, C.** (2012) Protocol: Chromatin immunoprecipitation  
644 (ChIP) methodology to investigate histone modifications in two model diatom species.  
645 *Plant Methods*, **8**, 48.

646 **Lo Presti, L., Lanver, D., Schweizer, G., Tanaka, S., Liang, L., Tollot, M., Zuccaro, A.,**  
647 **Reissmann, S. and Kahmann, R.** (2015) Fungal effectors and plant susceptibility. *Annu.*  
648 *Rev. Plant Biol.*, **66**, 513–545.

649 **Lorrain, C., Marchal, C., Hacquard, S., Delaruelle, C., Pétrowski, J., Petre, B., Hecker,**  
650 **A., Frey, P. and Duplessis, S.** (2018) The rust fungus *Melampsora larici-populina* expresses  
651 a conserved genetic program and distinct sets of secreted protein genes during infection  
652 of its two host plants, larch and poplar. *Mol. Plant Microbe Interact.*, **31**, 695-706.

653 **Ma, L.J., van der Does, H.C., Borkovich, K.A., Coleman, J.J., Daboussi, M.J., Di Pietro**  
654 **A., Dufresne, M., Freitag, M., Grabherr, M., Henrissat, B., Houterman, P.M., Kang, S.,**  
655 **Shim, W.B., Woloshuk, C., Xie, X., Xu, J.R., Antoniw, J., Baker, S.E., Bluhm, B.H.,**  
656 **Breakspear, A., Brown, D.W., Butchko, R.A., Chapman, S., Coulson, R., Coutinho, P.M.,**  
657 **Danchin, E.G., Diener, A., Gale, L.R., Gardiner, D.M., Goff, S., Hammond-Kosack, K.E.,**  
658 **Hilburn, K., Hua-Van, A., Jonkers, W., Kazan, K., Kodira, C.D., Koehrsen, M., Kumar, L.,**  
659 **Lee, Y.H., Li, L., Manners, J.M., Miranda-Saavedra, D., Mukherjee, M., Park, G., Park, J.,**  
660 **Park, S.Y., Proctor, R.H., Regev, A., Ruiz-Roldan, M.C., Sain, D., Sakthikumar, S., Sykes,**  
661 **S., Schwartz, D.C., Turgeon, B.G., Wapinski, I., Yoder, O., Young, S., Zeng, Q., Zhou, S.,**  
662 **Galagan, J., Cuomo, C.A., Kistler, H.C. and Rep, M.** (2010) Comparative genomics reveals  
663 mobile pathogenicity chromosomes in *Fusarium*. *Nature*, **464**, 367–373.

664 **McCarthy, D.J., Chen, Y. and Smyth, G.K.** (2012) Differential expression analysis of  
665 multifactor RNA-Seq experiments with respect to biological variation. *Nucleic Acids Res.*,  
666 **40**, 4288–4297.

667 **Meile, L., Croll, D., Brunner, P.C., Plissonneau, C., Hartmann, F.E., McDonald, B.A.**  
668 **and Sánchez-Vallet, A.** (2018) A fungal avirulence factor encoded in a highly plastic  
669 genomic region triggers partial resistance to septoria tritici blotch. *New Phytol.*, **219**,



670 1048–1061.

671 **Moeller, M., Habig, M., Freitag, M. and Stukenbrock, E.H.** (2018) Extraordinary  
672 genome instability and widespread chromosome rearrangements during vegetative  
673 growth. *Genetics* **210**, 517-529.

674 **Moeller, M., Schotanus, K., Soyer, J.L., Haueisen, J., Happ, K., Stralucke, M., Happel,**  
675 **P., Smith, K.M., Connolly, L.R., Freitag, M., and Stukenbrock E.H.** (2018) Destabilization  
676 of chromosome structure by histone H3 lysine 27 methylation. *BioRxiv.org*.

677 **Muller, P.Y., Janovjak, H., Miserez, A.R., and Dobbie, Z.** (2002) Processing of gene  
678 expression data generated by quantitative real-time RT-PCR. *BioTechniques*, **32**, 1372–  
679 1379.

680 **O'Connell, R.J., Thon, M.R., Hacquard, S., Amyotte, S.G., Kleemann, J., Torres, M.F.,**  
681 **Damm, U., Buiate, E.A., Epstein, L., Alkan, N., Altmüller, J., Alvarado-Balderrama, L.,**  
682 **Bauser, C.A., Becker, C., Birren, B.W., Chen, Z., Choi, J., Crouch, J.A., Duvick, J.P., Farman,**  
683 **M.A., Gan, P., Heiman, D., Henrissat, B., Howard, R.J., Kabbage, M., Koch, C., Kracher,**  
684 **B., Kubo, Y., Law, A.D., Lebrun, M.H., Lee, Y.H., Miyara, I., Moore, N., Neumann, U.,**  
685 **Nordström, K., Panaccione, D.G., Panstruga, R., Place, M., Proctor, R.H., Prusky, D.,**  
686 **Rech, G., Reinhardt, R., Rollins, J.A., Rounsley, S., Schardl, C.L., Schwartz, D.C., Shenoy,**  
687 **N., Shirasu, K., Sikhakolli, U.R., Stüber, K., Sukno, S.A., Sweigard, J.A., Takano, Y.,**  
688 **Takahara, H., Trail, F., van der Does, H.C., Voll, L.M., Will, I., Young, S., Zeng, Q., Zhang,**  
689 **J., Zhou, S., Dickman, M.B., Schulze-Lefert, P., Ver Loren van Themaat, E., Ma, L.J. and**  
690 **Vaillancourt, L.J.** (2012) Lifestyle transitions in plant pathogenic *Colletotrichum* fungi

691 deciphered by genome and transcriptome analyses. *Nat. Genet.*, **44**, 1060–1065.

692 **O'Driscoll, A., Kildea, S., Doohan, F., Spink, J. and Mullins, E.** (2014) The wheat-  
693 Septoria conflict: a new front opening up? *Trends Plant Sci.*, **19**, 602–610.

694 **Ohm, R.A., Feu, N., Henrissat, B., Schoch, C.L., Horwitz, B.A., Barry, K.W., Condon,**  
695 **B.J., Copeland, A.C., Dhillon, B., Glaser, F., Hesse, C.N., Kosti, I., LaButti, K., Lindquist,**  
696 **E.A., Lucas, S., Salamov, A.A., Bradshaw, R.E., Ciuffetti, L., Hamelin, R.C., Kema, G.H.,**  
697 **Lawrence, C., Scott, J.A., Spatafora, J.W., Turgeon, B.G., de Wit, P.J., Zhong, S., Goodwin,**  
698 **S.B. and Grigoriev, I.V.** (2012) Diverse lifestyles and strategies of plant pathogenesis  
699 encoded in the genomes of eighteen Dothideomycetes fungi. *PLoS Pathog.*, **8**, e1003037.

700 **Palma-Guerrero, J., Torriani, S.F., Zala, M., Carter, D., Courbot, M., Rudd, J.J.,**  
701 **McDonald, B.A. and Croll, D.** (2016) Comparative transcriptomic analyses of  
702 *Zymoseptoria tritici* strains show complex lifestyle transitions and intraspecific variability  
703 in transcription profiles. *Mol Plant Pathol.*, **17**, 845–859.

704 **Plissonneau, C., Stürchler, A. and Croll, D.** (2016) The evolution of orphan regions in  
705 genomes of a fungal pathogen of wheat. *MBio*, **7**(5).

706 **Poppe, S., Dorsheimer, L., Happel, P. and Stukenbrock, E.H.** (2015) Rapidly evolving  
707 genes are key players in host specialization and virulence of the fungal wheat pathogen  
708 *Zymoseptoria tritici* (*Mycosphaerella graminicola*). *PLoS Pathog.*, **11**, e1005055.

709 **Robinson, M.D., McCarthy, D.J. and Smyth, G.K.** (2010) edgeR: a Bioconductor  
710 package for differential expression analysis of digital gene expression data.

711 *Bioinformatics*, **26**, 139–140.

712 **Reyes-Dominguez, Y., Boedi, S., Sulyok, M., Wiesenberger, G., Stoppacher, N.,**  
713 **Krska, R. and Strauss, J.** (2012) Heterochromatin influences the secondary metabolite  
714 profile in the plant pathogen *Fusarium graminearum*. *Fungal Genet. Biol.*, **49**, 39–47.

715 **Rouxel, T., Grandaubert, J., Hane, J.K., Hoede, C., van de Wouw, A.P., Couloux, A.,**  
716 **Dominguez, V., Anthouard, V., Bally, P., Bourras, S., Cozijnsen, A.J., Ciuffetti, L.M.,**  
717 **Degrave, A., Dilmaghani, A., Duret, L., Fudal, I., Goodwin, S.B., Gout, L., Glaser, N.,**  
718 **Linglin, J., Kema, G.H., Lapalu, N., Lawrence, C.B., May, K., Meyer, M., Ollivier, B.,**  
719 **Poulain, J., Schoch, C.L., Simon, A., Spatafora, J.W., Stachowiak, A., Turgeon, B.G., Tyler,**  
720 **B.M., Vincent, D., Weissenbach, J., Amselem, J., Quesneville, H., Oliver, R.P., Wincker,**  
721 **P., Balesdent, M.H. and Howlett, B.J.** (2011) Effector diversification within compartments  
722 of the *Leptosphaeria maculans* genome affected by Repeat-Induced Point mutations. *Nat.*  
723 *Commun.*, **2**, 202.

724 **Rudd, J.J., Kanyuka, K., Hassani-Pak, K., Derbyshire, M., Andongabo, A.,**  
725 **Devonshire, J., Lysenko, A., Saqi, M., Desai, N.M., Powers, S.J., Hooper, J., Ambroso, L.,**  
726 **Bharti, A., Farmer, A., Hammond-Kosack, K.E., Dietrich, R.A. and Courbot, M.** (2015)  
727 Transcriptome and metabolite profiling of the infection cycle of *Zymoseptoria tritici* on  
728 wheat reveals a biphasic interaction with plant immunity involving differential pathogen  
729 chromosomal contributions and a variation on the hemibiotrophic lifestyle definition.  
730 *Plant Physiol.*, **167**, 1158–1185.

731 **Schotanus, K., Soyer, J.L., Connolly, L.R., Grandaubert, J., Happel, P., Smith, K.M.,**

732 **Freitag, M. and Stukenbrock, E.H.** (2015) Histone modifications rather than the novel  
733 regional centromeres of *Zymoseptoria tritici* distinguish core and accessory  
734 chromosomes. *Epigenetics Chromatin*, **8**, 41.

735 **Song, Q. and Smith, A.D.** (2011) Identifying dispersed epigenomic domains from  
736 ChIP-Seq data. *Bioinformatics*, **27**, 870–871.

737 **Soyer, J.L., El Ghalid, M., Glaser, N., Ollivier, B., Linglin, J., Grandaubert, J.,  
738 Balesdent M.H., Connolly, L.R., Freitag, M., Rouxel, T. and Fudal, I.** (2014) Epigenetic  
739 control of effector gene expression in the plant pathogenic fungus *Leptosphaeria*  
740 *maculans*. *PLoS Genet.*, **10**, e1004227.

741 **Soyer, J.L., Rouxel, T. and Fudal, I.** (2015a) Chromatin-based control of effector gene  
742 expression in plant-associated fungi. *Current Opin. Plant Biol.*, **26**, 51–56.

743 **Soyer, J.L., Möller, M., Schotanus, K., Connolly, L.R., Galazka, J.M., Freitag, M. and  
744 Stukenbrock E.H.** (2015b) Chromatin analyses of *Zymoseptoria tritici*: Methods for  
745 chromatin immunoprecipitation followed by high-throughput sequencing (ChIP-seq).  
746 *Fungal Genet. Biol.*, **79**, 63–70.

747 **Studdt, L., Rösler, S.M., Burkhardt, I., Arndt, B., Freitag, M., Humpf, H.U., Dickschat,  
748 J.S. and Tudzynski, B.** (2016) Knock-down of the methyltransferase Kmt6 relieves  
749 H3K27me3 and results in induction of cryptic and otherwise silent secondary metabolite  
750 gene clusters in *Fusarium fujikuroi*. *Environ. Microbiol.*, **18**, 4037–4054.

751 **Taylor, S., Wakem, M., Dijkman, G., Alsarraj, M. and Nguyen, M.** (2010) A practical

752 approach to RT-qPCR-Publishing data that conform to the MIQE guidelines. *Methods*, **50**,  
753 S1–5.

754 **Thorvaldsdóttir, H., Robinson, J.T. and Mesirov, J.P.** (2013) Integrative Genomics  
755 Viewer (IGV): high-performance genomics data visualization and exploration. *Brief.*  
756 *Bioinform.*, **14**, 178–192.

757 **Trapnell, C., Williams, B.A., Pertea, G., Mortazavi, A., Kwan, G., van Baren, M.J.,**  
758 **Salzberg, S.L., Wold, B.J. and Pachter, L.** (2010) Transcript assembly and quantification by  
759 RNA-Seq reveals unannotated transcripts and isoform switching during cell  
760 differentiation. *Nat. Biotechnol.*, **28**, 511–515.

761 **Tyler, B.M. and Rouxel, T.** Effectors of fungi and oomycetes: their virulence and  
762 avirulence functions, and translocation from pathogen to host cells. 2013, In *Molecular*  
763 *Plant Immunity*. G. Sessa, Ed., Wiley Blackwell Press, Chap. 7, pp. 123–167.

764 **Vlaardingerbroek, I., Beerens, B., Schmidt, S.M., Cornelissen, B.J. and Rep, M.**  
765 (2016) Dispensable chromosomes in *Fusarium oxysporum* f. sp. *lycopersici*. *Mol. Plant*  
766 *Pathol.*, **17**, 1455–1466.

767 **Wittenberg, A.H., van der Lee, T.A., Ben M'barek, S., Ware, S.B., Goodwin, S.B.,**  
768 **Kilian, A., Visser, R.G., Kema, G.H. and Schouten, H.J.** (2009) Meiosis drives extraordinary  
769 genome plasticity in the haploid fungal plant pathogen *Mycosphaerella graminicola*. *PLoS*  
770 *One*, **4**, e5863.

771 **Zhong, Z., Marcel, T.C., Hartmann, F.E., Ma X., Plissonneau, C., Zala, M., Ducasse,**

772 **A., Confais, J., Compain, J., Lapalu, N., Amselem, J., McDonald, B.A., Croll, D. and Palma-**  
773 **Guerrero, J. (2017) A small secreted protein in *Zymoseptoria tritici* is responsible for**  
774 **avirulence on wheat cultivars carrying the Stb6 resistance gene. *New Phytol.*, **214**, 619–**  
775 **631.**

776

### 777 **Figure legends**

778 **Figure 1. Euchromatic domains encompass more genes than heterochromatin domains**  
779 ***in vitro*.** Venn diagrams showing genes associated with the different post-translational  
780 histone modifications assessed using ChIP-sequencing in axenic culture. A) Genes at least  
781 partially associated with any of the histone modification. B) Genes completely associated  
782 with any of the histone modifications.

783 **Figure 2. Heterochromatic domains are enriched with putative effector genes that are**  
784 **up-regulated during the switch towards necrotrophic growth on wheat.** Example from a  
785 section of chromosome 5, harboring the putative effector gene ID Zt09\_chr\_5\_00271.  
786 Regions enriched in different histone modifications were identified using ChIP-seq with  
787 antibodies against H3K4me2 (light blue), H3K9me3 (purple), H3K27me3 (orange) and  
788 compared to the location of genomic features (coding sequences, dark blue; transposable  
789 elements, red) and to reads obtained by RNA-seq in axenic culture, 4 days post-infection  
790 (dpi) and 13 dpi.

791 **Figure 3. Genes associated with euchromatin are expressed while genes associated with**

792 **heterochromatin are repressed.** Expression assessed during axenic culture using RNA-  
793 sequencing. Boxplot of the  $\log_{10}$ (RPKM) of the genes totally associated with any of the  
794 histone modification.

795 **Figure 4. Genes associated with euchromatin and heterochromatin *in vitro* exhibit**  
796 **different expression profiles *in planta*.** Boxplot of the  $\log_{10}$  Fold Change (RPKM) of the  
797 genes located in a euchromatic domain *in vitro* (i.e. H3K4me2) or a heterochromatic  
798 domain *in vitro* (i.e. H3K9me3, H3K27me3 or H3K9me3/H3K27me3). Expression assessed  
799 during axenic culture and at 4 and 13 days post infection (dpi) using RNA-sequencing;  
800 genes differentially expressed at 4 dpi vs. axenic culture (A) or 13 dpi vs. 4 dpi (B). \*:  
801 Wilcoxon-test,  $P < 2.2 \cdot 10^{-16}$ : comparison of heterochromatic-associated genes between 4  
802 and 13 dpi.

803 **Figure 5. Putative effector genes are enriched in H3K9me3 and/or H3K27me3 *in vitro***  
804 **while histone H4 is enriched in H3K4me2.** Chromatin immunoprecipitation was  
805 performed during axenic culture to assess the levels of H3K4me2, H3K9me3 and  
806 H3K27me3 in the genomic sequence of four genes (H4, Histone H4: Zt09\_chr\_6\_00256;  
807 5\_00271: Zt09\_chr\_5\_00271; 6\_00192: Zt09\_chr\_6\_00192; 9\_00038:  
808 Zt09\_chr\_9\_00038) and a transposable element (DTH\_element5\_ZTIPO323).

809 **Figure 6. The up-regulation of three effector genes *in planta* is associated with a change**  
810 **of their histone modifications patterns.** ChIP was performed at 13 days post infection of  
811 wheat leaves by *Zymoseptoria tritici* and relative enrichment of (A) H3K4me2, (B)  
812 H3K9me3 and (C) H3K27me3 was assessed using qPCR and compared during the axenic

813 culture and at 13 dpi. 5\_00271: Zt09\_chr\_5\_00271; 6\_00192: Zt09\_chr\_6\_00192;  
814 6\_00192 pro: Zt09\_chr\_6\_00192, promoter; 9\_00038: Zt09\_chr\_9\_00038; K4, K9 and  
815 K27: H3K4me2, H3K9me3 and H3K27me3 respectively. Blue: axenic culture; red: 13 dpi.

816

## 817 **Table legends**

818 **Table 1. Number of genes in a given category according to their location in a H3K4me2,**  
819 **H3K9me3, H3K27me3 or H3K9me3/H3K27me3 domain *in vitro*.**

820 <sup>a</sup>“unknown” genes are genes encoding predicted or hypothetical proteins;

821 <sup>b</sup>Genes located up to 2 kb upstream or downstream to a transposable element sequence;

822 <sup>c</sup>Genes specifically expressed at 4 or 13 days post infection (dpi) compared to axenic  
823 culture or 4 dpi when RPKM  $\geq 2$  at the time point and RPKM  $\leq 2$  during the axenic culture  
824 or at 4 dpi;

825 <sup>d</sup>Up-regulated genes are genes with Log2 Fold Change (RPKM)  $\geq 1$  and FDR  $\leq 0.001$  in a  
826 given condition compared to the other;

827 <sup>e</sup>Down-regulated genes are genes with Log2 Fold Change (RPKM)  $\leq -1$  and FDR  $\leq 0.001$  in  
828 a given condition compared to the other;

829 <sup>f</sup>Genes located in a H3K4me2, H3K9me3, H3K27me3 or H3K9me3/H3K27me3 domain *in*  
830 *vitro*.

831

832 **Table 2. Number of putative effector genes located in vicinity to a transposable element**  
833 **or in a H3K4me2, H3K9me3, H3K27me3 and H3K9me3/H3K27me3 domain *in vitro*.**



834 Only putative effector genes located in the core genome of *Z. tritici* are shown here.

835 <sup>a</sup>Up-regulated genes are genes with Log2 Fold Change (RPKM)  $\geq 1$  and FDR  $\leq 0.001$  in a  
836 given condition compared to the other;

837 <sup>b</sup>Down-regulated genes are genes with Log2 Fold Change (RPKM)  $\leq -1$  and FDR  $\leq 0.001$  in  
838 a given condition compared to the other;

839 <sup>c</sup>Genes located up to 2 kb upstream or downstream to a transposable element sequence;

840 <sup>d</sup>Genes located in a H3K4me2, H3K9me3, H3K27me3 or H3K9me3/H3K27me3 *in vitro*.

841

842 **Table 3. Influence of *kmt1*, *kmt6* or *kmt1/kmt6* deletions on gene expression.**

843 <sup>a</sup>Genes located in a H3K4me2, H3K9me3, H3K27me3 or H3K9me3, H3K27me3 *in vitro*;

844 <sup>b</sup>“unknown” genes are genes encoding predicted or hypothetical proteins;

845 <sup>c</sup>Genes located up to 2 kb upstream or downstream to a transposable element sequence;

846 <sup>d</sup>Genes specifically expressed at 4 or 13 days post infection (dpi) compared to axenic  
847 culture or 4 dpi when RPKM  $\geq 2$  at the time point and RPKM  $\leq 2$  during the axenic culture  
848 or at 4 dpi;

849 <sup>e</sup>Up-regulated genes are genes with Log2 Fold Change (RPKM)  $\geq 1$  and FDR  $\leq 0.001$  in a  
850 given condition compared to the other;

851 <sup>f</sup>Down-regulated genes are genes with Log2 Fold Change (RPKM)  $\leq -1$  and FDR  $\leq 0.001$  in  
852 a given condition compared to the other;

853 <sup>h</sup>Genes deregulated in *KMT1*, *KMT6* or *KMT1/KMT6* deletions background, Log2 Fold  
854 Change (RPKM)  $\leq -1$  or  $\geq 1$  and FDR  $\leq 0.001$ .

855 **Bold:** the given domain contains significantly less genes of the given category compared

856 to the rest of the genome; grey: the given domain is enriched for the category of genes  
857 compared to the rest of the genome.

858

859 **Table 4. Expression of selected genes associated with heterochromatin *in vitro*, in the**  
860 ***KMT1*, *KMT6* and *KMT1/KMT6* deletion mutants.**

861 <sup>a</sup>Genes located up to 2 kb upstream or downstream to a transposable element sequence;

862 <sup>b</sup>Genes located in a H3K4me2, H3K9me3, H3K27me3 or H3K9me3, H3K27me3 *in vitro*;

863 <sup>c</sup>Genes significantly up-regulated 13 days post-infection (dpi) compared to 4 dpi;

864 <sup>d</sup>Gene expression relative to the WT strain and to the GAPDH encoding gene.

865

866 **Supplementary data legends**

867

868 **Figure S1. Wheat actin was enriched in histone H3K4me2 and was used as a control for**  
869 **chromatin immunoprecipitation *in planta*.** ChIP was performed at 13 days post infection  
870 of wheat leaves by *Zymoseptoria tritici*. Enrichment of the wheat actin gene in H3K4me2,  
871 H3K9me3 and H3K27me3 was assessed using qPCR.

872

873 **Table S1. Enrichment analysis of PKS/NRPS- and orphan genes in a H3K4me2, H3K9me3,**  
874 **H3K27me3 or H3K9me3/H3K27me3 domain *in vitro*.**

875 <sup>a</sup>Genes encoding PKS, NRPS, and orphan genes as predicted by Grandaubert *et al.* (2015);

876 <sup>b</sup>Genes with a RPKM  $\geq 2$ ;

877 <sup>c</sup>Genes with Log2 Fold Change (RPKM)  $\geq 1$  and FDR  $\leq 0.001$  at 4 days post infection (dpi)

878 compared to axenic culture or 13 dpi compared to 4 dpi were considered as up-regulated  
879 at a given time point compared to the other. Only the genes with a RPKM  $\geq 2$  at least at  
880 the time point during which it is up-regulated were kept for the analysis;

881 <sup>d</sup>Genes with Log2 Fold Change (RPKM)  $\leq -1$  and FDR  $\leq 0.001$  at 4 days post infection (dpi)  
882 compared to axenic culture or 13 dpi compared to 4 dpi were considered as down-  
883 regulated at a given time point compared to the other;

884 <sup>e</sup>Genes located in a H3K4me2, H3K9me3, H3K27me3 or H3K9me3/H3K27me3 *in vitro* as  
885 identified with RSEG (see Experimental Procedures; Schotanus *et al.*, 2015).

886 Blue: the given domain contains significantly less genes of the given category compared  
887 to the rest of the genome; orange: the given domain is enriched for the category of genes  
888 compared to the rest of the genome.

889

890 **Table S2. Enrichment analysis of genes of a given category in a H3K4me2, H3K9me3,**  
891 **H3K27me3 or H3K9me3/H3K27me3 domain *in vitro*.**

892 <sup>a</sup>Genes of “unknown function” are genes encoding predicted or hypothetical proteins;  
893 genes encoding CAZymes as predicted by Grandaubert *et al.* (2015);

894 <sup>b</sup>Genes located up to 2 kb upstream or downstream to a transposable element sequence  
895 as predicted by Grandaubert *et al.* (2015);

896 <sup>c</sup>Genes with a RPKM  $\geq 2$ ;

897 <sup>d</sup>Genes with Log2 Fold Change (RPKM)  $\geq 1$  and FDR  $\leq 0.001$  at 4 days post infection (dpi)  
898 compared to axenic culture or 13 dpi compared to 4 dpi were considered as up-regulated  
899 at a given time point compared to the other. Only the genes with a RPKM  $\geq 2$  at least at

900 the time point during which it is up-regulated were kept for the analysis;

901 <sup>e</sup>Genes with Log2 Fold Change (RPKM)  $\leq -1$  and FDR  $\leq 0.001$  at 4 dpi compared to axenic

902 culture or 13 dpi compared to 4 dpi were considered as down-regulated at a given time

903 point compared to the other;

904 <sup>f</sup>Genes located in a H3K4me2, H3K9me3, H3K27me3 or H3K9me3/H3K27me3 *in vitro* as

905 identified with RSEG (see Experimental Procedures; Schotanus *et al.*, 2015).

906 Blue: the given domain contains significantly less genes of the given category compared

907 to the rest of the genome; orange: the given domain is enriched for the category of genes

908 compared to the rest of the genome.

909

910 **Table S3. PFAM analysis of the genes located in H3K4me2 domains *in vitro*.**

911

912 **Table S4. PFAM analysis of the genes located in H3K9me3/H3K27me3 domains *in vitro*.**

913

914 **Table S5. PFAM analysis of the genes located in H3K9me3 domains *in vitro*.**

915

916 **Table S6. PFAM analysis of the genes located in H3K27me3 domains *in vitro*.**

917

918 **Table S7. Enrichment analysis of putative effector genes in the vicinity of a transposable**

919 **element or in a H3K4me2, H3K9me3, H3K27me3 and H3K9me3/H3K27me3 domain *in***

920 ***vitro*, and according to their expression.**

921 <sup>a</sup>Genes encoding predicted secreted proteins (SP) were considered as genes encoding

922 putative effector genes for this study, as predicted by Grandaubert *et al.* (2015);  
923 <sup>b</sup>Genes with Log2 Fold Change (RPKM)  $\geq 1$  and FDR  $\leq 0.001$  at 4 days post infection (dpi)  
924 compared to axenic culture or 13 dpi compared to 4 dpi were considered as up-regulated  
925 at a given time point compared to the other. Only the genes with a RPKM  $\geq 2$  at least at  
926 the time point during which it is up-regulated were kept for the analysis;  
927 <sup>c</sup>Genes with Log2 Fold Change (RPKM)  $\leq -1$  and FDR  $\leq 0.001$  at 4 dpi compared to axenic  
928 culture or 13 dpi compared to 4 dpi were considered as down-regulated at a given time  
929 point compared to the other;  
930 <sup>d</sup>Genes located up to 2 kb upstream or downstream to a transposable element sequence  
931 as predicted by Grandaubert *et al.* (2015);  
932 <sup>e</sup>Genes located in a H3K4me2, H3K9me3, H3K27me3 or H3K9me3/H3K27me3 *in vitro* as  
933 identified with RSEG (see Experimental Procedures; Schotanus *et al.*, 2015).  
934 Blue: the given domain contains significantly less genes of the given category compared  
935 to the rest of the genome; orange: the given domain is enriched for the category of genes  
936 compared to the rest of the genome.

937

938 **Table S8. Trimethylation of lysine 9 and / or 27 of histone H3 is reduced for three**  
939 **candidate effector genes up-regulated 13 days post infection of wheat leaves compared**  
940 **to axenic culture.**

941 <sup>a</sup>Orphan genes as described by Grandaubert *et al.* (2015);

942 <sup>b</sup>Genes located at a distance below 2 Kb of a transposable element (Grandaubert *et al.*,  
943 2015);

944 <sup>c</sup>Relative enrichment, *in vitro* or 13 dpi, of H3K4me2, H3K9me3 or H3K27me3 for the given

945 locus compared to histone H4 encoding gene (Zt09\_chr\_6\_00256);

946 <sup>d</sup>Gene expression *in vitro* (Kellner *et al.*, 2014);

947 <sup>e</sup>Gene expression from Haueisen *et al.* (2018);

948 <sup>f</sup>Expression rank of the candidate genes at 13 days post infection (dpi).

949

950 **Table S9. List of primers used in this study.**

951

952

953

**Table 1. Number of genes in a given category according to their location in a H3K4me2, H3K9me3, H3K27me3 or H3K9me3/H3K27me3 domain *in vitro*.**

|                                                                | genome                   |                        | H3K4me2-domains <sup>f</sup> |                        | H3K9me3-domains <sup>f</sup> |                        | H3K27me3-domains <sup>f</sup> |                        | H3K9me3+H3K27me3-domains <sup>f</sup> |                        |
|----------------------------------------------------------------|--------------------------|------------------------|------------------------------|------------------------|------------------------------|------------------------|-------------------------------|------------------------|---------------------------------------|------------------------|
|                                                                | nb. in the entire genome | nb. in the core genome | nb. in the entire genome     | nb. in the core genome | nb. in the entire genome     | nb. in the core genome | nb. in the entire genome      | nb. in the core genome | nb. in the entire genome              | nb. in the core genome |
| total number of genes                                          | 11754                    | 11111                  | 4992                         | 4991                   | 89                           | 89                     | 2179                          | 1661                   | 230                                   | 171                    |
| unknown <sup>a</sup>                                           | 6329                     | 5699                   | 1944                         | 1943                   | 50                           | 50                     | 1734                          | 1223                   | 193                                   | 152                    |
| PKS/NRPS                                                       | 20                       | 20                     | 1                            | 1                      | 0                            | 0                      | 10                            | 10                     | 0                                     | 0                      |
| CAZymes                                                        | 227                      | 227                    | 58                           | 58                     | 4                            | 4                      | 32                            | 32                     | 3                                     | 3                      |
| genes < 2 Kb Tes <sup>b</sup>                                  | 1723                     | 1464                   | 369                          | 368                    | 83                           | 83                     | 545                           | 358                    | 202                                   | 154                    |
| orphan genes                                                   | 1717                     | 1221                   | 177                          | 177                    | 21                           | 21                     | 794                           | 392                    | 136                                   | 91                     |
| genes expressed at 4 dpi vs axenic <sup>c</sup>                | 559                      | 546                    | 92                           | 92                     | 4                            | 4                      | 149                           | 138                    | 9                                     | 9                      |
| genes expressed at 13 dpi vs axenic <sup>c</sup>               | 886                      | 778                    | 98                           | 98                     | 10                           | 10                     | 355                           | 253                    | 20                                    | 17                     |
| genes expressed at 13 dpi vs 4 dpi <sup>c</sup>                | 729                      | 577                    | 53                           | 53                     | 10                           | 10                     | 368                           | 224                    | 27                                    | 20                     |
| genes up-regulated at 4 dpi vs. <i>in vitro</i> <sup>d</sup>   | 784                      | 775                    | 290                          | 290                    | 6                            | 6                      | 118                           | 112                    | 10                                    | 10                     |
| genes down-regulated at 4 dpi vs. <i>in vitro</i> <sup>e</sup> | 1027                     | 1001                   | 379                          | 379                    | 3                            | 3                      | 179                           | 156                    | 23                                    | 21                     |
| genes up-regulated at 13 dpi vs. 4 dpi <sup>d</sup>            | 1773                     | 1630                   | 388                          | 388                    | 12                           | 12                     | 507                           | 390                    | 38                                    | 32                     |
| genes down-regulated at 13 dpi vs. 4 dpi <sup>e</sup>          | 798                      | 796                    | 385                          | 385                    | 5                            | 5                      | 81                            | 80                     | 12                                    | 11                     |

<sup>a</sup>“unknown” genes are genes encoding predicted or hypothetical proteins;

<sup>b</sup>Genes located up to 2 kb upstream or downstream to a transposable element sequence;

<sup>c</sup>Genes specifically expressed at 4 or 13 days post infection (dpi) compared to axenic culture or 4 dpi when RPKM  $\geq 2$  at the time point and RPKM  $\leq 2$  during the axenic culture or at 4 dpi;

<sup>d</sup>Up-regulated genes are genes with Log2 Fold Change (RPKM)  $\geq 1$  and FDR  $\leq 0.001$  in a given condition compared to the other;

<sup>e</sup>Down-regulated genes are genes with Log2 Fold Change (RPKM)  $\leq -1$  and FDR  $\leq 0.001$  in a given condition compared to the other;

<sup>f</sup>Genes located in a H3K4me2, H3K9me3, H3K27me3 or H3K9me3/H3K27me3 domain *in vitro*.



**Table 2. Number of putative effector genes located in vicinity to a transposable element or in a H3K4me2, H3K9me3, H3K27me3 and H3K9me3/H3K27me3 domain *in vitro*.**

|                                                                        | core genome | TE-associated genes <sup>c</sup> | H3K4me2-domains <sup>d</sup> | H3K9me3-domains <sup>d</sup> | H3K27me3-domains <sup>d</sup> | H3K9+H3K27me3-domains <sup>d</sup> |
|------------------------------------------------------------------------|-------------|----------------------------------|------------------------------|------------------------------|-------------------------------|------------------------------------|
| total number of genes                                                  | 11111       | 1464                             | 4991                         | 89                           | 1661                          | 171                                |
| putative effector genes                                                | 865         | 185                              | 168                          | 15                           | 205                           | 26                                 |
| putative effector genes up-regulated at 4 dpi vs axenic <sup>a</sup>   | 114         | 14                               | 24                           | 3                            | 22                            | 1                                  |
| putative effector genes down-regulated at 4 dpi vs axenic <sup>b</sup> | 107         | 32                               | 23                           | 0                            | 29                            | 6                                  |
| putative effector genes up-regulated at 13 dpi vs 4 dpi <sup>a</sup>   | 309         | 84                               | 42                           | 4                            | 87                            | 12                                 |
| putative effector genes down-regulated at 13 dpi vs 4 dpi <sup>b</sup> | 74          | 10                               | 22                           | 1                            | 10                            | 1                                  |

Only putative effector genes located in the core genome of *Z. tritici* are shown here.

<sup>a</sup>Up-regulated genes are genes with Log2 Fold Change (RPKM)  $\geq 1$  and FDR  $\leq 0.001$  in a given condition compared to the other;

<sup>b</sup>Down-regulated genes are genes with Log2 Fold Change (RPKM)  $\leq -1$  and FDR  $\leq 0.001$  in a given condition compared to the other;

<sup>c</sup>Genes located up to 2 kb upstream or downstream to a transposable element sequence;

<sup>d</sup>Genes located in a H3K4me2, H3K9me3, H3K27me3 or H3K9me3/H3K27me3 *in vitro*.



**Table 3. Number of genes deregulated due to *KMT1*, *KMT6* or *KMT1/KMT6* deletions, *in vitro*.**

|                                                                | genome            |            | $\Delta kmt1^h$   |              |                   |              | $\Delta kmt6^h$   |              |                   |              |
|----------------------------------------------------------------|-------------------|------------|-------------------|--------------|-------------------|--------------|-------------------|--------------|-------------------|--------------|
|                                                                | nb. in the genome | proportion | up-regulated      |              | down-regulated    |              | up-regulated      |              | down-regulated    |              |
|                                                                |                   |            | nb. in the genome | proportion   | nb. in the genome | proportion   | nb. in the genome | proportion   | nb. in the genome | proportion   |
| total number of genes                                          | 11754             |            | 579               |              | 284               |              | 274               |              | 481               |              |
| H3K4me2 <sup>a</sup>                                           | 4992              | 0.425      | 116               | <b>0.200</b> | 71                | <b>0.250</b> | 92                | <b>0.336</b> | 194               | 0.403        |
| H3K9me3 <sup>a</sup>                                           | 89                | 0.008      | 4                 | 0.007        | 8                 | 0.028        | 0                 |              | 2                 | 0.004        |
| H3K27me3 <sup>a</sup>                                          | 2179              | 0.185      | 168               | 0.290        | 57                | 0.201        | 116               | 0.423        | 63                | <b>0.131</b> |
| H3K9/K27me3 <sup>a</sup>                                       | 230               | 0.020      | 20                | 0.035        | 16                | 0.056        | 23                | 0.084        | 5                 | 0.010        |
| unknown <sup>b</sup>                                           | 6329              | 0.538      | 399               | 0.689        | 117               | 0.412        | 175               | 0.639        | 175               | <b>0.364</b> |
| CAZymes                                                        | 227               | 0.019      | 10                | 0.017        | 9                 | 0.032        | 7                 | 0.026        | 7                 | 0.015        |
| putative effectors                                             | 874               | 0.074      | 88                | 0.152        | 56                | 0.197        | 24                | 0.088        | 59                | 0.123        |
| genes < 2 Kb Tes <sup>c</sup>                                  | 1723              | 0.147      | 112               | 0.193        | 83                | 0.292        | 79                | 0.288        | 64                | 0.133        |
| orphan genes                                                   | 1717              | 0.146      | 101               | 0.174        | 33                | 0.116        | 88                | 0.321        | 27                | <b>0.056</b> |
| genes expressed at 4 dpi vs axenic <sup>d</sup>                | 559               | 0.048      | 55                | 0.095        | 0                 | NA           | 3                 | 0.011        | 7                 | <b>0.015</b> |
| genes expressed at 13 dpi vs axenic <sup>d</sup>               | 886               | 0.075      | 121               | 0.209        | 2                 | 0.007        | 25                | 0.091        | 9                 | <b>0.019</b> |
| genes expressed at 13 dpi vs 4 dpi <sup>d</sup>                | 729               | 0.062      | 105               | 0.181        | 12                | 0.042        | 44                | 0.161        | 21                | 0.044        |
| genes up-regulated at 4 dpi vs. <i>in vitro</i> <sup>e</sup>   | 784               | 0.067      | 104               | 0.180        | 22                | 0.077        | 11                | 0.040        | 72                | 0.150        |
| genes down-regulated at 4 dpi vs. <i>in vitro</i> <sup>f</sup> | 1027              | 0.087      | 61                | 0.105        | 55                | 0.194        | 34                | 0.124        | 120               | 0.249        |
| genes up-regulated at 13 dpi vs. 4 dpi <sup>e</sup>            | 1773              | 0.151      | 276               | 0.477        | 78                | 0.275        | 92                | 0.336        | 120               | 0.249        |
| genes down-regulated at 13 dpi vs. 4 dpi <sup>f</sup>          | 798               | 0.068      | 48                | 0.083        | 61                | 0.215        | 15                | 0.055        | 113               | 0.235        |

**Table 3. Continued**

|                                                                | $\Delta kmt1/kmt6^h$ |              |                   |              |
|----------------------------------------------------------------|----------------------|--------------|-------------------|--------------|
|                                                                | up-regulated         |              | down-regulated    |              |
|                                                                | nb. in the genome    | proportion   | nb. in the genome | proportion   |
| total number of genes                                          | 558                  |              | 455               |              |
| H3K4me2 <sup>a</sup>                                           | 72                   | <b>0.129</b> | 147               | <b>0.323</b> |
| H3K9me3 <sup>a</sup>                                           | 8                    | 0.014        | 10                | 0.022        |
| H3K27me3 <sup>a</sup>                                          | 248                  | 0.444        | 69                | 0.152        |
| H3K9/K27me3 <sup>a</sup>                                       | 29                   | 0.052        | 22                | 0.048        |
| unknown <sup>b</sup>                                           | 420                  | 0.753        | 157               | <b>0.345</b> |
| CAZymes                                                        | 7                    | 0.013        | 10                | 0.022        |
| putative effectors                                             | 65                   | 0.116        | 62                | 0.136        |
| genes < 2 Kb Tes <sup>c</sup>                                  | 138                  | 0.247        | 125               | 0.275        |
| orphan genes                                                   | 166                  | 0.297        | 50                | 0.110        |
| genes expressed at 4 dpi vs axenic <sup>d</sup>                | 62                   | 0.111        | 0                 | NA           |
| genes expressed at 13 dpi vs axenic <sup>d</sup>               | 137                  | 0.246        | 2                 | <b>0.004</b> |
| genes expressed at 13 dpi vs 4 dpi <sup>d</sup>                | 119                  | 0.213        | 18                | 0.040        |
| genes up-regulated at 4 dpi vs. <i>in vitro</i> <sup>e</sup>   | 94                   | 0.168        | 25                | 0.055        |
| genes down-regulated at 4 dpi vs. <i>in vitro</i> <sup>f</sup> | 33                   | 0.059        | 123               | 0.270        |
| genes up-regulated at 13 dpi vs. 4 dpi <sup>e</sup>            | 229                  | 0.410        | 117               | 0.257        |
| genes down-regulated at 13 dpi vs. 4 dpi <sup>f</sup>          | 38                   | 0.068        | 73                | 0.160        |

**Table 3. Influence of *kmt1*, *kmt6* or *kmt1/kmt6* deletions on gene expression.**

<sup>a</sup>Genes located in a H3K4me2, H3K9me3, H3K27me3 or H3K9me3, H3K27me3 *in vitro*;

<sup>b</sup>“unknown” genes are genes encoding predicted or hypothetical proteins;

<sup>c</sup>Genes located up to 2 kb upstream or downstream to a transposable element sequence;

<sup>d</sup>Genes specifically expressed at 4 or 13 days post infection (dpi) compared to axenic culture or 4 dpi when RPKM  $\geq 2$  at the time point and RPKM  $\leq 2$  during the axenic culture or at 4 dpi;

<sup>e</sup>Up-regulated genes are genes with Log2 Fold Change (RPKM)  $\geq 1$  and FDR  $\leq 0.001$  in a given condition compared to the other;

<sup>f</sup>Down-regulated genes are genes with Log2 Fold Change (RPKM)  $\leq -1$  and FDR  $\leq 0.001$  in a given condition compared to the other;

<sup>h</sup>Genes deregulated in *KMT1*, *KMT6* or *KMT1/KMT6* deletions background, Log2 Fold Change (RPKM)  $\leq -1$  or  $\geq 1$  and FDR  $\leq 0.001$ .

Bold: the given domain contains significantly less genes of the given category compared to the rest of the genome; grey: the given domain is enriched for the category of genes compared to the rest of the genome.

**Table 4. Expression of selected genes associated with heterochromatin *in vitro*, in a *kmt1*, *kmt6* and *kmt1/kmt6* deletion background.**

| ID                | orphan <sup>a</sup> | TE <sup>b</sup> | SP <sup>a</sup> | H3K4me2 <sup>c</sup> | H3K9me3 <sup>c</sup> | H3K27me3 <sup>c</sup> | <i>in planta</i> expression <sup>d</sup> | relative expression vs. WT <sup>e</sup> |               |                    |
|-------------------|---------------------|-----------------|-----------------|----------------------|----------------------|-----------------------|------------------------------------------|-----------------------------------------|---------------|--------------------|
|                   |                     |                 |                 |                      |                      |                       | up 13 vs 4 dpi                           | $\Delta kmt1$                           | $\Delta kmt6$ | $\Delta kmt1/kmt6$ |
| Zt09_chr_2_00407  | -                   | yes             |                 | -                    | yes                  |                       | -                                        | 2                                       | 3             | 7                  |
| Zt09_chr_2_00483  | yes                 | -               | -               | -                    | -                    | yes                   | -                                        |                                         | 3             | 2-8                |
| Zt09_chr_3_00231  | yes                 | yes             | yes             | -                    | -                    | yes                   | 6                                        | -                                       | -             | -                  |
| Zt09_chr_4_00279  | -                   | yes             | yes             | -                    | yes                  |                       | 6                                        | -                                       | 3-5           | -                  |
| Zt09_chr_8_00723  | yes                 | yes             |                 | -                    |                      |                       | 3                                        | 2-5                                     | 200           | 20                 |
| Zt09_chr_9_00004  | -                   | yes             |                 | -                    | yes                  | yes                   | 3                                        | 6-16                                    | 65-90         | ~9                 |
| Zt09_chr_9_00005  | -                   | yes             | yes             | -                    | yes                  | yes                   | 8                                        | -                                       | 40            | ~3                 |
| Zt09_chr_11_00525 | -                   | yes             |                 | -                    | yes                  | yes                   | 6                                        | 20-69                                   | 200-1000      | 140                |
| Zt09_chr_13_00020 | -                   | -               | -               | -                    | -                    | yes                   | 10                                       | 1-4                                     | 28-36         | 6-9                |

<sup>a</sup>Genes located up to 2 kb upstream or downstream to a transposable element sequence;

<sup>b</sup>Genes located in a H3K4me2, H3K9me3, H3K27me3 or H3K9me3, H3K27me3 *in vitro*;

<sup>c</sup>Genes significantly up-regulated 13 days post-infection (dpi) compared to 4 dpi;

<sup>d</sup>Gene expression relative to the WT strain and to the GAPDH encoding gene.

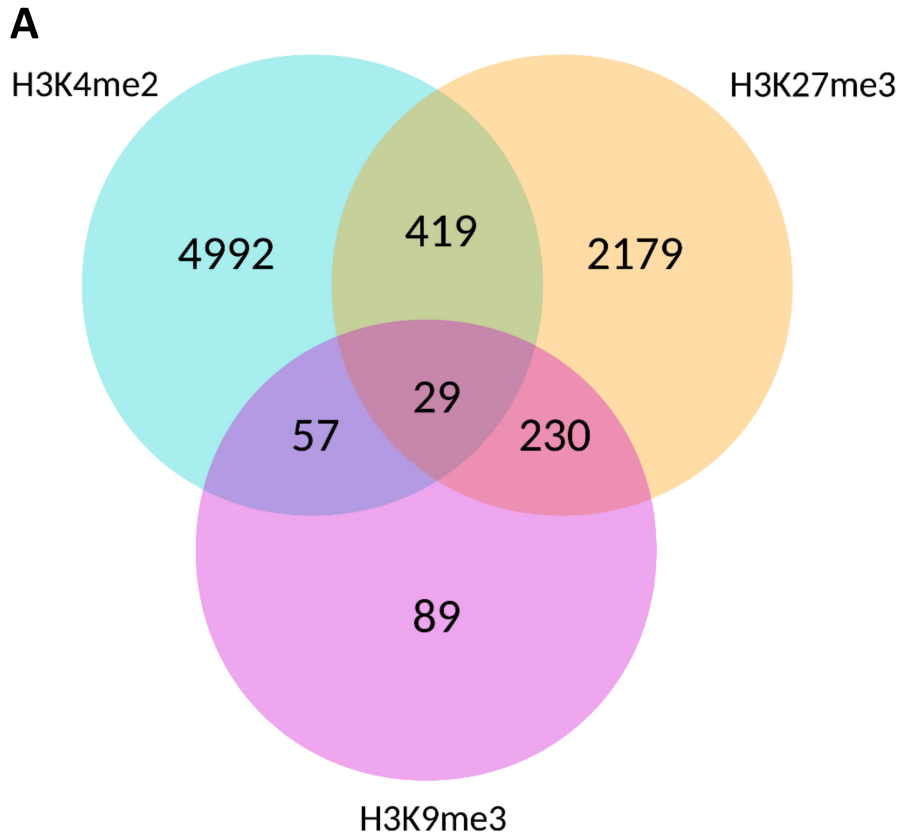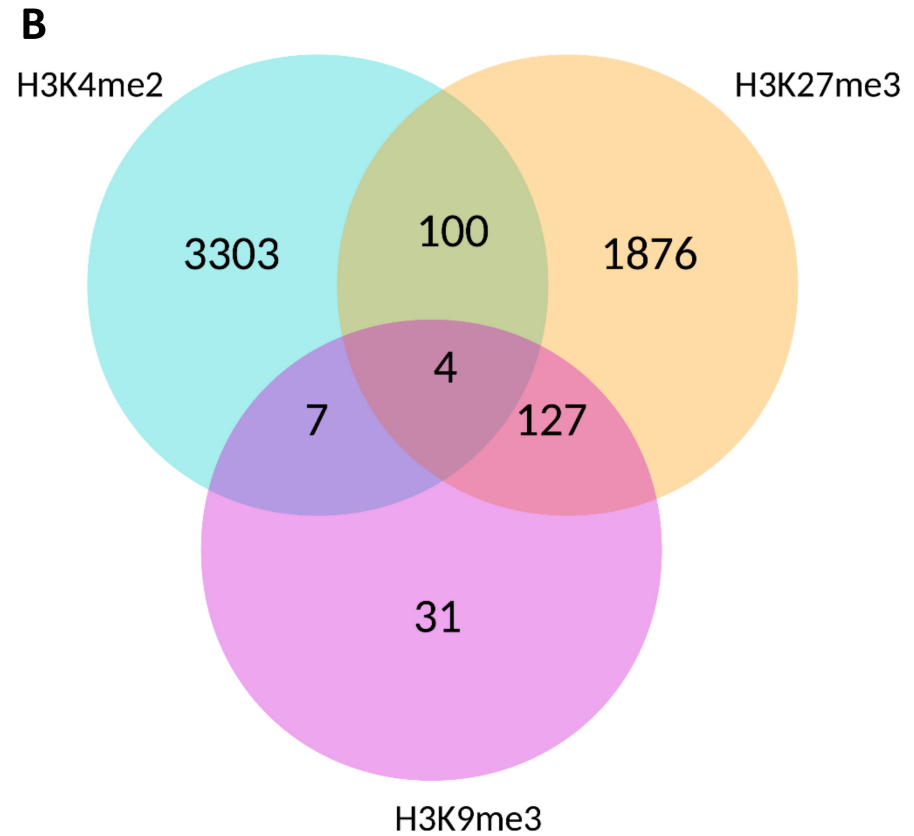

**Figure 1. Euchromatic domains encompass more genes than heterochromatin domains *in vitro*.** Venn diagrams showing genes associated with the different post-translational histone modifications assessed using ChIP-sequencing in axenic culture. A) Genes at least partially associated with any of the histone modification. B) Genes completely associated with any of the histone modifications.

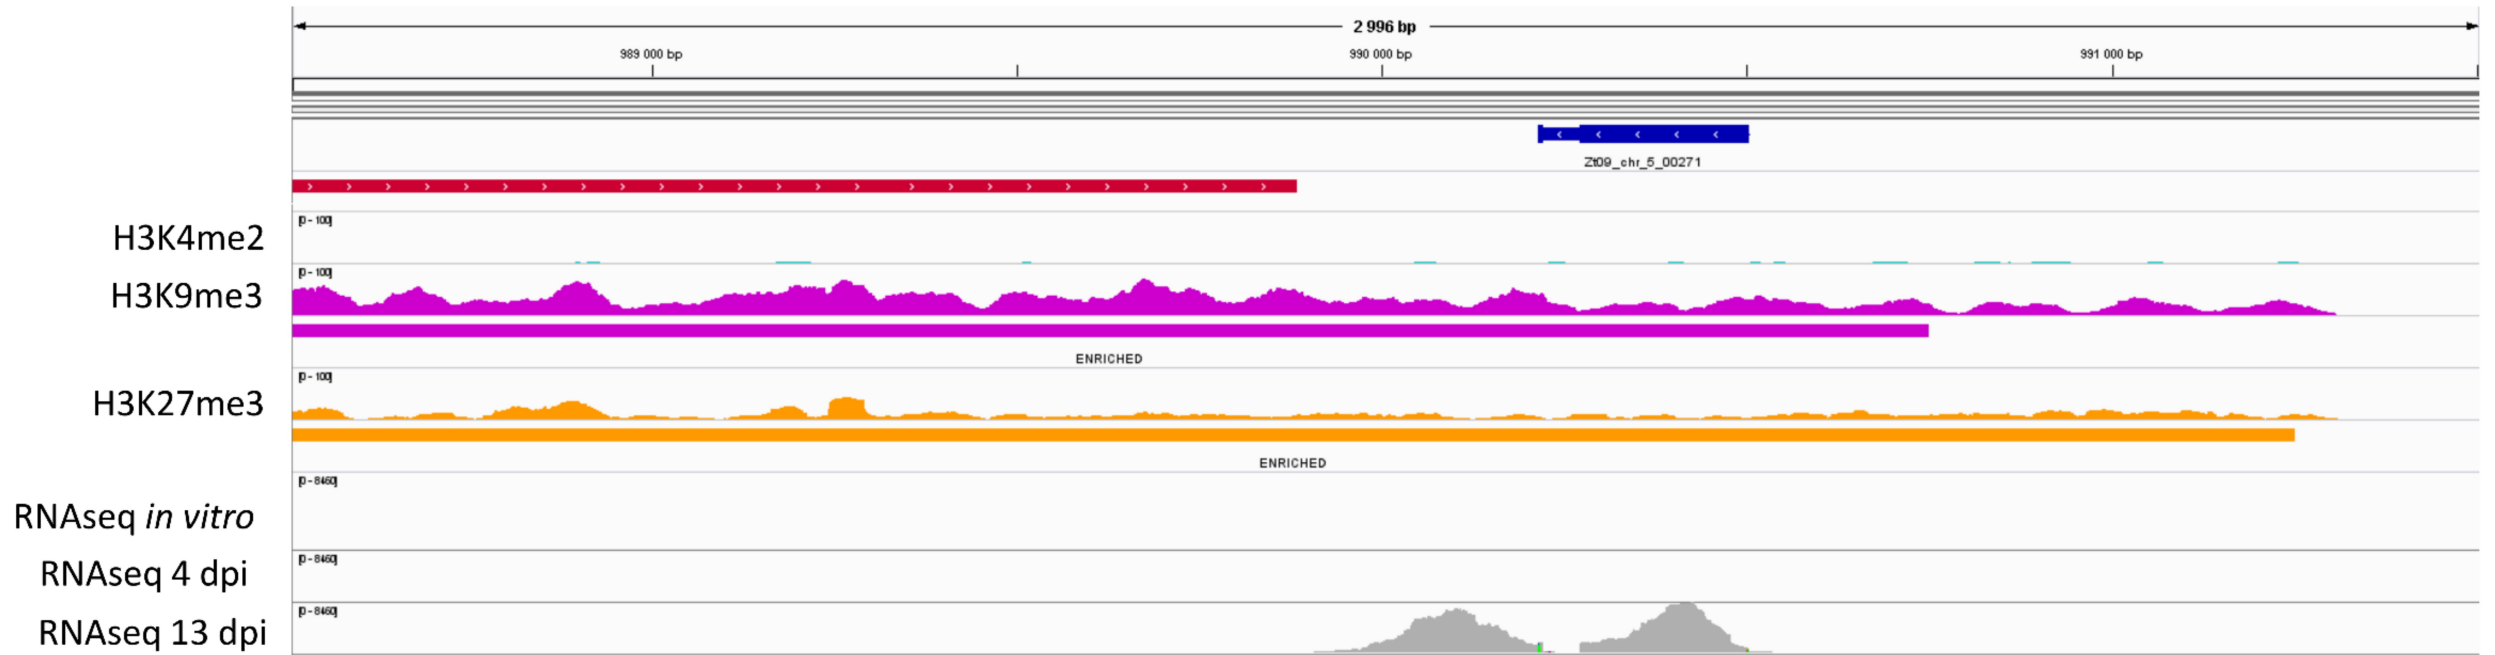

**Figure 2. Heterochromatic domains are enriched with putative effector genes that are up-regulated during the switch towards necrotrophic growth on wheat.** Example from a section of chromosome 5, harboring the putative effector gene ID Zt09\_chr\_5\_00271. Regions enriched in different histone modifications were identified using ChIP-seq with antibodies against H3K4me2 (light blue), H3K9me3 (purple), H3K27me3 (orange) and compared to the location of genomic features (coding sequences, dark blue; transposable elements, red) and to reads obtained by RNA-seq in axenic culture, 4 days post-infection (dpi) and 13 dpi.



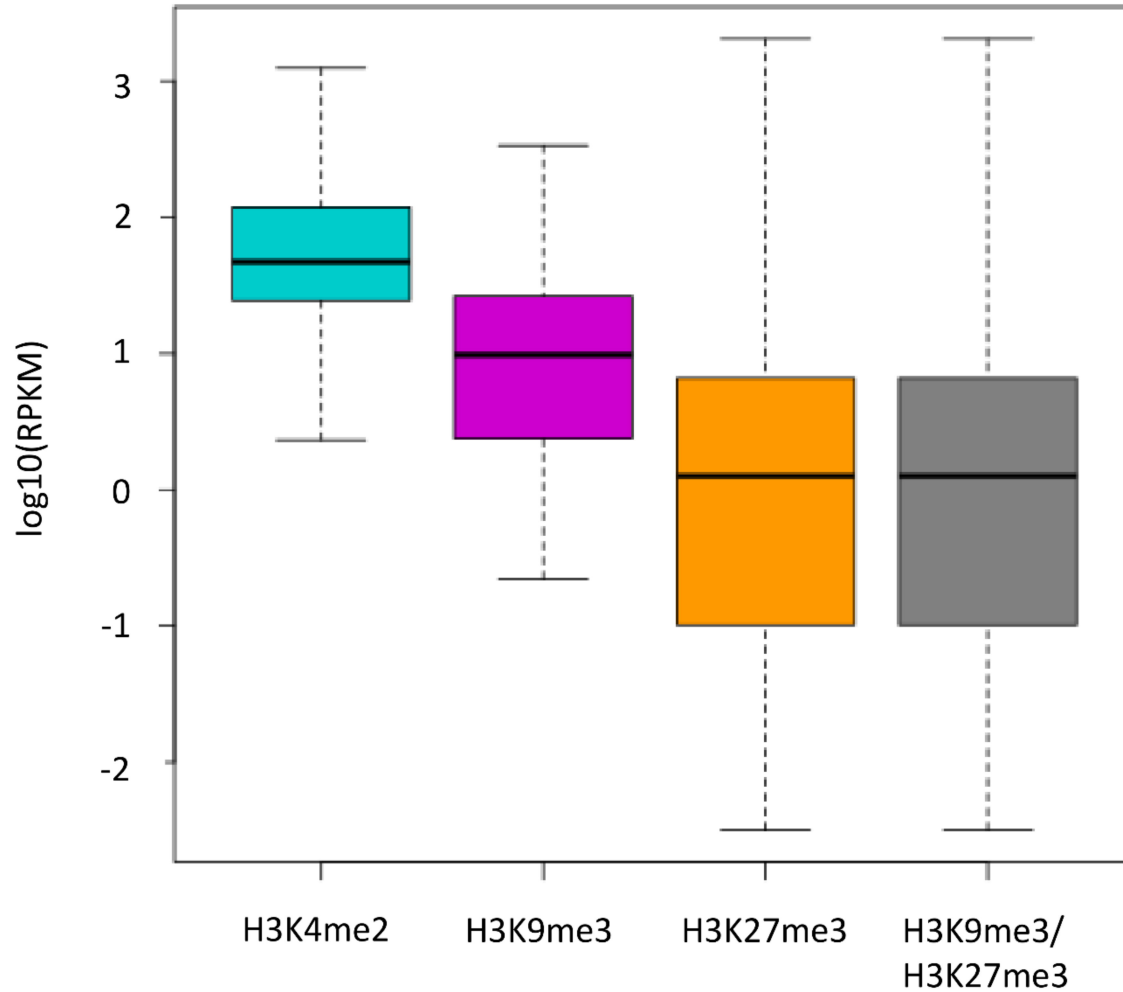

**Figure 3. Genes associated with euchromatin are expressed while genes associated with heterochromatin are repressed.** Expression assessed during axenic culture using RNA-sequencing. Boxplot of the  $\log_{10}(\text{RPKM})$  of the genes totally associated with any of the histone modification.

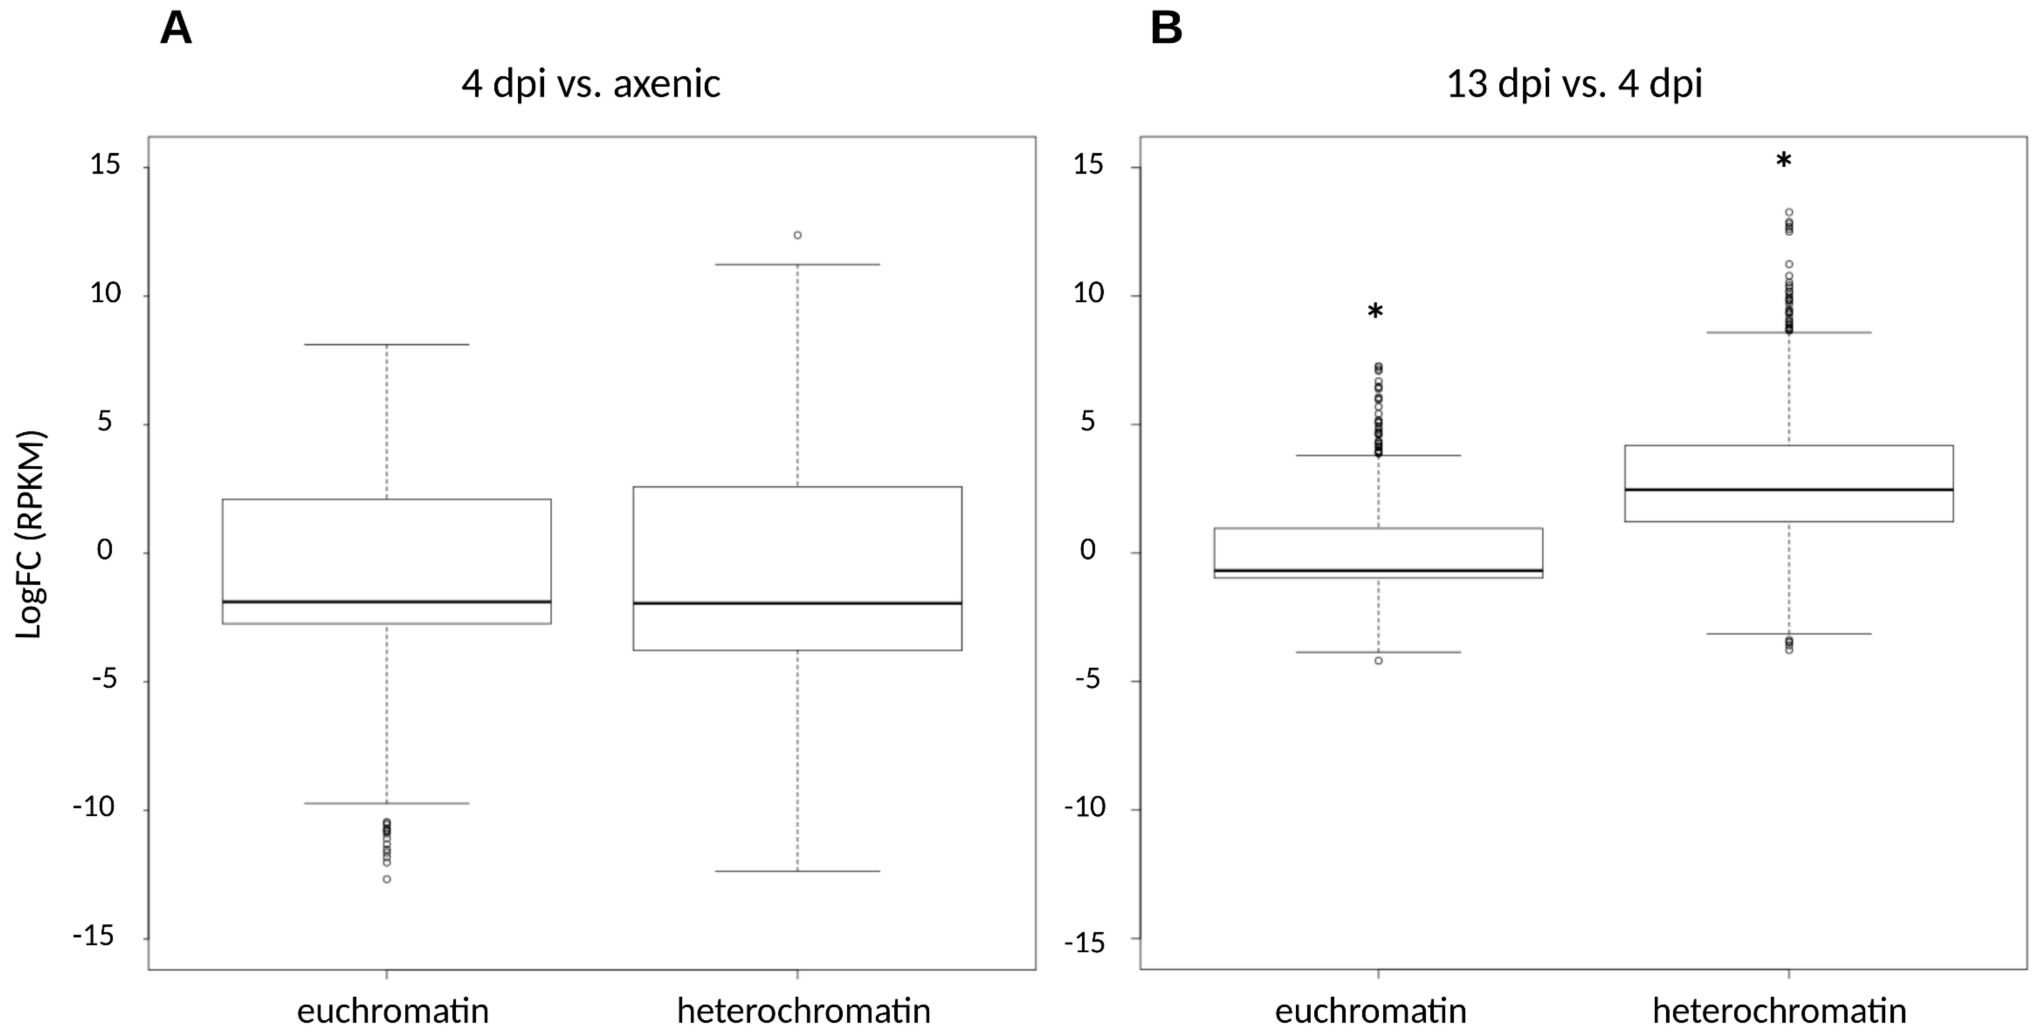

**Figure 4. Genes associated with euchromatin and heterochromatin *in vitro* exhibit different expression profiles *in planta*.** Boxplot of the  $\log_{10}$  Fold Change (RPKM) of the genes located in a euchromatic domain *in vitro* (i.e. H3K4me2) or a heterochromatic domain *in vitro* (i.e. H3K9me3, H3K27me3 or H3K9me3/H3K27me3). Expression assessed during axenic culture and at 4 and 13 days post infection (dpi) using RNA-sequencing; genes differentially expressed at 4 dpi vs. axenic culture (A) or 13 dpi vs. 4 dpi (B). \*: Wilcoxon-test,  $P < 2.2 \cdot 10^{-16}$ : comparison of heterochromatin-associated genes between 4 and 13 dpi.

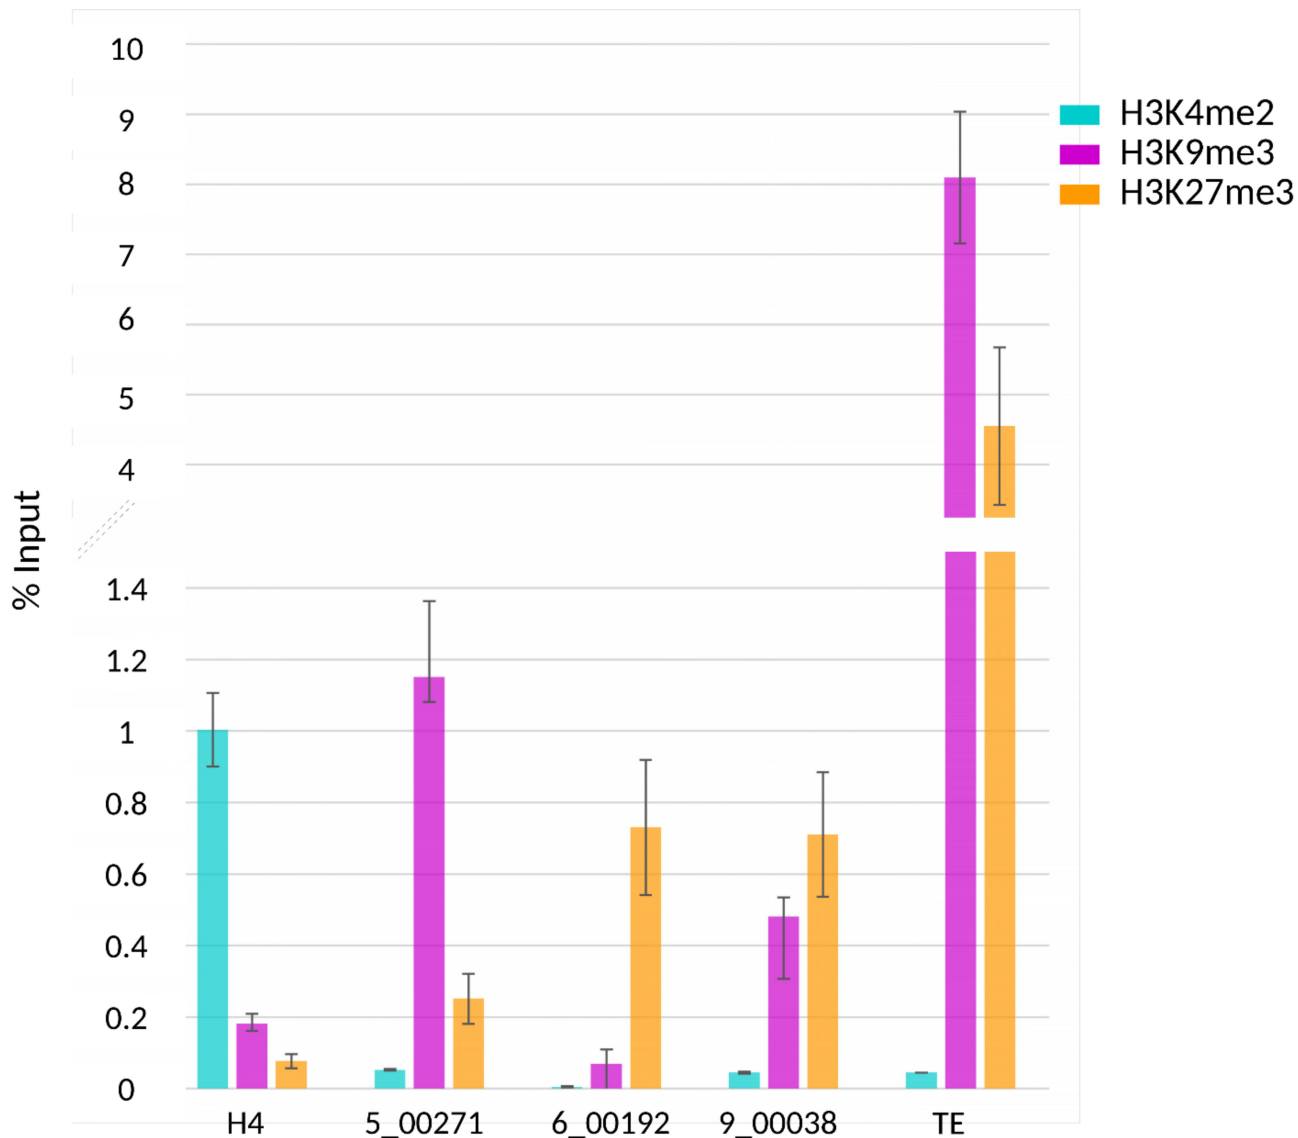

**Figure 5. Putative effector genes are enriched in H3K9me3 and/or H3K27me3 *in vitro* while histone H4 is enriched in H3K4me2.** Chromatin immunoprecipitation was performed during axenic culture to assess the levels of H3K4me2, H3K9me3 and H3K27me3 in the genomic sequence of four genes (H4, Histone H4: Zt09\_chr\_6\_00256; 5\_00271: Zt09\_chr\_5\_00271; 6\_00192: Zt09\_chr\_6\_00192; 9\_00038: Zt09\_chr\_9\_00038) and a transposable element (DTH\_element5\_ZTIPO323).

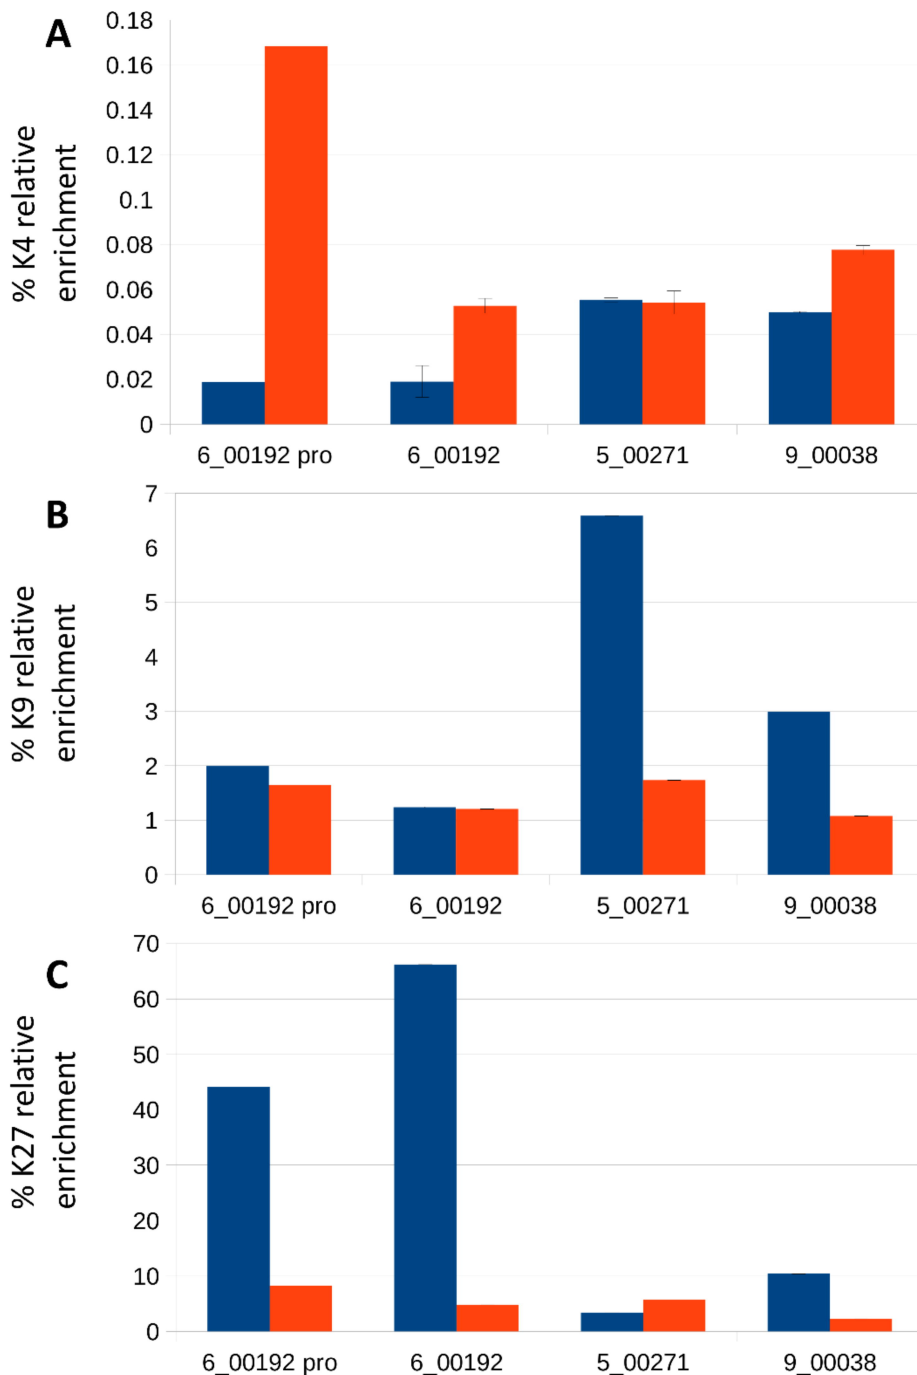

**Figure 6.** The up-regulation of three effector genes *in planta* is associated with a change of their histone modifications patterns. ChIP was performed at 13 days post infection of wheat leaves by *Zymoseptoria tritici* and relative enrichment of (A) H3K4me2, (B) H3K9me3 and (C) H3K27me3 was assessed using qPCR and compared during the axenic culture and at 13 dpi. 5\_00271: Zt09\_chr\_5\_00271; 6\_00192: Zt09\_chr\_6\_00192; 6\_00192 pro: Zt09\_chr\_6\_00192, promoter; 9\_00038: Zt09\_chr\_9\_00038; K4, K9 and K27: H3K4me2, H3K9me3 and H3K27me3 respectively. Blue: axenic culture; red: 13 dpi.
